# Supplementary material for: Characterization of oligopeptide patterns in large protein sets
Source: PubMed Central journal article supplement (PMC2231379; doi:10.1186/1471-2164-8-346), 2007-10-01
Supplement: 1471-2164-8-346-S2.pdf [file 1471-2164-8-346-S2.pdf]

Additional file 2 - Selected peptide patterns

| Category | Kingdom | Data set | Pattern                                                                                         | Number of occurrences | Number of species | Feature                                 | Protein family                                          | Note                                                                                                     |
|----------|---------|----------|-------------------------------------------------------------------------------------------------|-----------------------|-------------------|-----------------------------------------|---------------------------------------------------------|----------------------------------------------------------------------------------------------------------|
| POP      | A       | sp       | GSGKT                                                                                           | 117                   |                   | No feature                              | Protein with kinase, ATP-binding or helicase properties |                                                                                                          |
| POP      | A       | g        | WDFGD                                                                                           | 303                   |                   | 12 Domain and topo domain               | Found in many different proteins                        |                                                                                                          |
| POP      | A       | g        | CPKCG                                                                                           | 273                   |                   | 30 No feature                           | Found in many different proteins                        |                                                                                                          |
| POP      | A       | g        | CPVCG                                                                                           | 258                   |                   | 31 No feature                           |                                                         | Found in all archaeal species                                                                            |
| POP      | A       | g        | GMDKM                                                                                           | 59                    |                   | 31 No feature                           | chaperonin thermosome                                   | Found in all archaeal species                                                                            |
| POP      | B       | sp       | QFHPE                                                                                           | 644                   |                   | Active site                             |                                                         |                                                                                                          |
| POP      | B       | sp       | MIFQHIFQHF/QHFN                                                                                 | 179/181/201           |                   | Domain                                  | Methionine import ATP-binding protein metN              |                                                                                                          |
| POP      | B       | sp       | AKCYGKCYG/CYGGD                                                                                 | 345/300/302           |                   | No feature                              | GTP-binding protein lepA                                |                                                                                                          |
| POP      | B       | sp       | TVWRQ/VWRQA                                                                                     | 335/349               |                   | No feature                              | Elongation factor G                                     |                                                                                                          |
| POP      | B       | sp       | GMQFD/MQFDR                                                                                     | 385/375               |                   | No feature                              | 60 kDa chaperonin                                       |                                                                                                          |
| POP      | B       | g        | WCGPC                                                                                           | 599                   |                   | 275 Disulfide and active site           | Thioredoxins                                            | Found in almost all bacterial species                                                                    |
| POP      | B       | g        | CTTNC                                                                                           | 396                   |                   | 273 Active site                         | Glyceraldehyde-3-phosphate dehydrogenase                | Found in almost all bacterial species, second cystein catalytic residue [ref ST1]                        |
| POP      | B       | g        | NCWDN                                                                                           | 218                   |                   | 41 No feature                           | Integrase or transposase                                | Found only once in Swissprot                                                                             |
| POP      | E       | sp       | AMHYT, WWNFG, WIWGG, HICRD, PWGQM, QMSFW/MSFWG and EWYFL                                        | >1300                 |                   |                                         | Cytochrome b protein                                    | Part of the known conserved regions Qo, Qi and the two heme binding segments [ref ST2]                   |
| POP      | E       | sp       | IRYMH/RYMHA/YMHAN                                                                               | -500                  |                   | metal and hemegroup                     | Cytochrome b protein                                    |                                                                                                          |
| POP      | E       | sp       | WNIGI                                                                                           | -500                  |                   |                                         | Cytochrome b protein                                    |                                                                                                          |
| POP      | E       | sp       | QCLFW                                                                                           | -500                  |                   |                                         | Cytochrome b protein                                    |                                                                                                          |
| POP      | E       | sp       | VWFQN/WFQNR, KIWFQ/WFQNA, WTTVWTVWTD, HVVWHM/VWHMP/WHMPA, GHPWG/HPWGN, PFMRW/FMRWR/MRWRD, WNIGI | 235/642, 448/499      |                   | DNA-binding                             | Homeobox associated proteins                            |                                                                                                          |
| POP      | E       | sp       | HRAMH                                                                                           | -430                  |                   | binding, active site                    | Ribulose biphosphate carboxylase (RuBisCO)              | RuBisCO catalyzes the first major step in carbon fixation in the Calvin Cycle [ref ST3]                  |
| POP      | E       | sp       | VYPWT/YPWTD                                                                                     | 403/377               |                   | No feature                              | Ribulose biphosphate carboxylase (RuBisCO)              | Part of various hemoglobin subunits                                                                      |
| POP      | E       | g        | QRHIT                                                                                           | 669                   |                   | Zinc finger                             |                                                         | Mainly found in human proteins                                                                           |
| POP      | E       | g        | MWDCM                                                                                           | 198                   |                   | 23 Repeat                               | Sodium chanel proteins                                  |                                                                                                          |
| POP      | E       | g        | FWWCC                                                                                           | 283                   |                   | 29 No feature                           |                                                         | Found in proteins in the Wnt singalyng pathway                                                           |
| POP      | E       | g        | WCCYV                                                                                           | 207                   |                   | 25 No feature                           |                                                         | Found in proteins in the Wnt singalyng pathway                                                           |
| POP      | E       | g        | CDQYW                                                                                           | 180                   |                   | 24                                      | Tyrosine-protein phosphatases                           |                                                                                                          |
| POP      | E       | g        | WWDHF                                                                                           | 569                   |                   | 3 No feature                            | All but 6 are putative retrotransposons in rice         | Not found in Swissprot, High abundance only from a few species                                           |
| POP      | E       | g        | WCMRH                                                                                           | 313                   |                   | 13 No feature                           | All but 14 are putative retrotransposons in rice        | Not found in Swissprot, High abundance only from a few species                                           |
| POP      | E       | g        | YCKWH                                                                                           | 203                   |                   | 3 No feature                            | Proteins mainly part of the retrotranspos family        | High abundance only from a few species                                                                   |
| NEP      | E       | sp       | CSCCC                                                                                           | 40 in rand.           |                   | Compositional bias                      |                                                         | Several consecutive cysteines                                                                            |
| NEP      | E       | g        | RCCLM                                                                                           | 50 in rand.           |                   | No feature                              |                                                         |                                                                                                          |
| ORP      | A       | sp       | WRCKT                                                                                           | 23                    |                   | No feature                              | Isoleucyl- and valyl-tRNA synthetase                    |                                                                                                          |
| ORP      | A       | sp       | RYWGI                                                                                           | 16                    |                   | No feature                              | Isoleucyl- and valyl-tRNA synthetase                    |                                                                                                          |
| ORP      | A       | sp       | TAWNK                                                                                           | 12                    |                   | Motif                                   | Isoleucyl-tRNA synthetase                               |                                                                                                          |
| ORP      | A       | sp       | HHNTD                                                                                           | 19                    |                   | No feature                              | S-adenosylmethionine synthetase                         |                                                                                                          |
| ORP      | A       | sp       | DPHKM/PHKMG                                                                                     | 12                    |                   | binding                                 | L-tyrosine decarboxylase                                |                                                                                                          |
| ORP      | A       | sp       | PHTSCHTSCG                                                                                      | 10                    |                   | metal                                   | Acetyl-CoA decarboxylase/synthase                       |                                                                                                          |
| ORP      | A       | sp       | RKMHT                                                                                           | 12                    |                   | active site                             | Glutamyl-tRNA amidotransferase subunit D                |                                                                                                          |
| ORP      | A       | g        | EMCCH/MCCHY/CCHYD                                                                               | 18                    |                   | No feature                              |                                                         | All in same protein and same species, <i>Methanospirillum hungatei</i> JF-1                              |
| ORP      | B       | sp       | FRCGF                                                                                           | 268                   |                   | No feature                              |                                                         |                                                                                                          |
| ORP      | B       | sp       | FGRFC                                                                                           | 245                   |                   | No feature                              | GTP-binding protein lepA                                |                                                                                                          |
| ORP      | B       | sp       | DWMEQ                                                                                           | 265                   |                   | No feature                              | Elongation factor G                                     |                                                                                                          |
| ORP      | B       | sp       | YHDVD                                                                                           | 235                   |                   | No feature                              | Elongation factor G                                     |                                                                                                          |
| ORP      | B       | sp       | MGAQM                                                                                           | 234                   |                   | No feature                              | 60 kDa chaperonin                                       | Protein also found among POP-B, not found in eukaryotes                                                  |
| ORP      | B       | sp       | MNPMMD                                                                                          | 210                   |                   | No feature                              |                                                         |                                                                                                          |
| ORP      | B       | sp       | CDKIT                                                                                           | 132                   |                   | metal                                   | Dihydroxy-acid dehydratase                              | The protein acts in the final step in the biosynthesis of isoleucine caline in bacteria [ref ST4]        |
| ORP      | B       | sp       | SCSGM                                                                                           | 110                   |                   | metal                                   | Dihydroxy-acid dehydratase                              | The protein acts in the final step in the biosynthesis of isoleucine caline in bacteria [ref ST4]        |
| ORP      | B       | sp       | CGRYE                                                                                           | 124                   |                   | binging                                 | M1G-methyltransferase                                   | Bacterial specific tRNA modifying enzyme. Essential for the correct reading during translation [ref ST5] |
| ORP      | B       | sp       | GHYEG                                                                                           | 104                   |                   | binging                                 | M1G-methyltransferase                                   | Bacterial specific tRNA modifying enzyme. Essential for the correct reading during translation [ref ST5] |
| ORP      | B       | g        | FCDWY                                                                                           | 140                   |                   | 138 No feature                          | Valyl-tRNA synthetase                                   | The bacterial form of valyl-tRNA synthetase                                                              |
| ORP      | B       | g        | HYNWH                                                                                           | 216                   |                   | 9 Domain                                | Transposase                                             | 205 copies of transposase in <i>Bordetella pertussis</i> Thoma 1, most frequent                          |
| ORP      | B       | g        | IMTWM                                                                                           | 190                   |                   | 7 No feature                            | Transposase and penicilin binding protein               | 184 copies of transposase in <i>Mycobacterium ulcerans</i> Ag99                                          |
| ORP      | B       | g        | EFWCR                                                                                           | 109                   |                   | 8 No feature                            |                                                         | Multicopy transposase protein in <i>Yersinia pestis</i> and <i>Salmonella enterica</i>                   |
| ORP      | E       | sp       | FAFHFI/AFHFI/FHFIL, IRYMH/RYMHA/YMHAN                                                           | -1000                 |                   | metal                                   | Cytochrome b protein                                    | Several also found in swissprot POP                                                                      |
| ORP      | E       | sp       | KIWFQ/WFQNR/ONRRM                                                                               | 448/642/317           |                   | DNA-binding                             | Homeobox associated proteins                            | Also found in POP                                                                                        |
| ORP      | E       | sp       | YPWTQ/PWTQR                                                                                     | 377/386               |                   | No feature                              | Hemoglobin                                              | Hemoglobin is a typical eukaryotic specific family                                                       |
| ORP      | E       | sp       | HYCRD                                                                                           | 372                   |                   | No feature                              | RuBisCO                                                 | Different pattern from those of the RuBisCO associated POP patterns                                      |
| ORP      | E       | sp       | PIVMH/VMDHY                                                                                     | 388                   |                   | No feature                              | RuBisCO                                                 | Different pattern from those of the RuBisCO associated POP patterns                                      |
| ORP      | E       | g        | ECKQC                                                                                           | 10768                 |                   | 34 Zinc finger                          |                                                         |                                                                                                          |
| ORP      | E       | g        | CPCNK                                                                                           | 405                   |                   | 22 covalently libid binding             | Synaptosomal-associated 25 kDa protein                  |                                                                                                          |
| ORP      | E       | g        | WGCDF                                                                                           | 379                   |                   | 41 No feature                           | Dynein                                                  |                                                                                                          |
| URP      | A       | sp       | QQQQQ                                                                                           | 9113 in E+B           |                   | compositional bias                      |                                                         | 2226 if overlaps are not counted, not significant                                                        |
| URP      | A       | sp       | PPPPP                                                                                           | 5681 in E+B           |                   | compositional bias                      |                                                         | 2533 if overlaps are not counted, not significant                                                        |
| URP      | A       | sp       | NNNNN                                                                                           | 2215 in E+B           |                   | compositional bias                      |                                                         | 615 if overlaps are not counted, not significant                                                         |
| URP      | A       | sp       | AYAILAILRS                                                                                      | 1641/1527 in E+B      |                   | No feature                              | Mostly found in cytochrome b                            | Two most significant (p <= 0.16 and 0.017, resp.)                                                        |
| URP      | A       | g        | THTGE                                                                                           | 13209 in E+B          |                   | B:63<br>E:44<br>Zinc finger             | Found in many different proteins                        |                                                                                                          |
| URP      | A       | g        | HRDLK                                                                                           | 6019 in E+B           |                   | B:126<br>E:50<br>Domain and active site | Found in many different proteins                        | Found in 50 of the 52 eukaryotic genomes, and 126 of 303 bacterial genomes.                              |
| URP      | A       | g        | TAGQE                                                                                           | 3116 in E+B           |                   | B:112<br>E:49<br>NP binding             | Found in many different proteins                        | Found in 49 of the 52 eukaryotic genomes, and 112 of 303 bacterial genomes.                              |
| URP      | A       | g        | LHYAA                                                                                           | 2312 in E+B           |                   | B:128<br>E:47<br>Repeat                 |                                                         | Found in 47 of the 52 eukaryotic genomes, and 128 of 303 bacterial genomes.                              |
| URP      | A       | g        | LPGPP                                                                                           | 3423 in E+B           |                   | B:135<br>E:42<br>Region                 | Mostly found in collagen associated proteins            |                                                                                                          |

| Category | Kingdom | Data set | Pattern            | Number of occurrences | Number of species  | Feature                | Protein family                                         | Note                                                                                                                                                                                                                                                                                                                                                                                                                                                                                                                                  |
|----------|---------|----------|--------------------|-----------------------|--------------------|------------------------|--------------------------------------------------------|---------------------------------------------------------------------------------------------------------------------------------------------------------------------------------------------------------------------------------------------------------------------------------------------------------------------------------------------------------------------------------------------------------------------------------------------------------------------------------------------------------------------------------------|
| URP      | A       | g        | DVNDN/DNDAP        | 3865/3470 in E+B      | B:63/72<br>E:44/40 | Domain and topo domain | Cadherin-associated proteins                           | Patterns are part of the extracellular domain of membrane bound cadherins that contains characteristic repeats involved in the cell-cell adhesion [ref ST6]                                                                                                                                                                                                                                                                                                                                                                           |
| URP      | B       | sp       | AYVAY/YVAYP, FCAEA | 348/432,379 in A+E    |                    | No feature             | RuBisCO                                                |                                                                                                                                                                                                                                                                                                                                                                                                                                                                                                                                       |
| URP      | B       | sp       | LRLSC/RLSCA        | 492/332 in A+E        |                    | No feature             | Found in immunoglobulin heavy chain and maturase K etc |                                                                                                                                                                                                                                                                                                                                                                                                                                                                                                                                       |
| URP      | B       | sp       | GHPIS              | 398 in A+E            |                    | No feature             | Maturase K                                             | Associated to a protein for intron splicing in plants                                                                                                                                                                                                                                                                                                                                                                                                                                                                                 |
| URP      | B       | sp       | RNLSH              | 333 in A+E            |                    | No feature             | Maturase K                                             | Associated to a protein for intron splicing in plants                                                                                                                                                                                                                                                                                                                                                                                                                                                                                 |
| URP      | B       | sp       | WDTAG              | 503 in A+E            |                    | NP binding             | Chlorophyll binding protein + others                   | Plant associated                                                                                                                                                                                                                                                                                                                                                                                                                                                                                                                      |
| URP      | B       | g        | MCVDY              | 1094 in A+E           | E:10               | No feature             | Retrotransposon                                        | Retrotransposon, primarily found in rice.                                                                                                                                                                                                                                                                                                                                                                                                                                                                                             |
| URP      | B       | g        | TYMCE/MYCEA        | 412/435 in A+E        | E:4/15             | Region/domain          | Retrotransposon                                        | Retrotransposon, primarily found in rice.                                                                                                                                                                                                                                                                                                                                                                                                                                                                                             |
| URP      | B       | g        | HHCPW              | 525 in E + 0 in A     | E:48               | Zinc finger            | Palmitoyltransferase                                   | Part of a known DHHC tetrapeptide motif.                                                                                                                                                                                                                                                                                                                                                                                                                                                                                              |
| URP      | E       | sp       | YAEQY              | 270 in A+B            |                    | No feature             | Serine hydroxymethyltransferase                        | Most abundant in other kingdoms.                                                                                                                                                                                                                                                                                                                                                                                                                                                                                                      |
| URP      | E       | sp       | VMPQT              | 223 in A+B            |                    | Region                 | Translation initiation factor IF-2                     |                                                                                                                                                                                                                                                                                                                                                                                                                                                                                                                                       |
| URP      | E       | sp       | GSHYD/YHDVD        | 200/235 in A+B        |                    | No feature             | Elongation factor G                                    |                                                                                                                                                                                                                                                                                                                                                                                                                                                                                                                                       |
| URP      | E       | g        | GWMHD              | 110 in A+B            | A:2<br>B:100       | No feature             | 1,4-alpha-glucan branching enzyme                      | Is widespread in the bacterial kingdom and found in 100 of 303 bacterial genomes.                                                                                                                                                                                                                                                                                                                                                                                                                                                     |
| URP      | E       | g        | QWAYA              | 133 in A+B            | A:2<br>B:37        | No feature             | UDP-N-acetylmurate-L-alanine ligase                    | Found in proteins that synthesize peptidoglycan murein for the bacterial cell wall.                                                                                                                                                                                                                                                                                                                                                                                                                                                   |
| URP      | E       | g        | FCDWY              | 140 in A+B            | A:0<br>B:138       | No feature             | Valyl-tRNA synthetase                                  | Found in many bacterial genomes.                                                                                                                                                                                                                                                                                                                                                                                                                                                                                                      |
| URP      | E       | g        | WGGWW              | 119 in A+B            | A:0<br>B:86        | Transmembrane          | Cytochrome c associated                                | Membrane associated                                                                                                                                                                                                                                                                                                                                                                                                                                                                                                                   |
| URP      | E       | g        | PFHMW              | 110 in A+B            | A:5<br>B:95        | No feature             | NADH-ubiquinone oxidoreductase chain N                 | A pattern found in many bacteria, present in NADH-ubiquinone oxidoreductase chain N, a protein which is part of the proton-pumping complex I required for ATP-synthesis. The pattern matches the quinone motif in the fourth cytoplasmic loop and the histidine has been shown to be an active site residue by mutational analysis [ref ST7]. The complex is found also in the eukaryotic mitochondria. However this pentapeptide is unique to the bacterial forms and is found in 95 of the 303 bacterial species in the genome set. |
| URP      | E       | g        | IMTWM              | 190 in A+B            | A:0<br>B:7         | No feature             | Transposase and penicillin binding protein             | Also found in ORP-B, most hits to transposase motifs in Mycobacterium ulcerans Ahy99                                                                                                                                                                                                                                                                                                                                                                                                                                                  |

#### References

- ST1 Yun M, Park CG, Kim JY, Park HW: Structural analysis of glyceraldehyde 3-phosphate dehydrogenase from Escherichia coli: direct evidence of substrate binding and cofactor-induced conformational changes. *Biochemistry* 2000, 39(35):10702-10.
- ST2 Howell N: Evolutionary conservation of protein regions in the protonmotive cytochrome b and their possible roles in redox catalysis. *J Mol Evol* 1989, 29(2):157-69.
- ST3 Spreitzer RJ, Salvucci ME: Rubisco: structure, regulatory interactions, and possibilities for a better enzyme. *Annu Rev Plant Biol* 2002, 53(NIL):449-75.
- ST4 MYERS JW: Dihydroxy acid dehydrase: an enzyme involved in the biosynthesis of isoleucine and valine. *J Biol Chem* 1961, 236(NIL):1414-8.
- ST5 Ahn HJ, Kim HW, Yoon HJ, Lee BI, Suh SW, Yang JK: Crystal structure of tRNA(m1G37)methyltransferase: insights into tRNA recognition. *EMBO J* 2003, 22(11):2593-603.
- ST6 Halbleib JM, Nelson WJ: Cadherins in development: cell adhesion, sorting, and tissue morphogenesis. *Genes Dev* 2006, 20(23):3199-214.
- ST7 Amarnah B, Vik SB: Mutagenesis of subunit N of the Escherichia coli complex I. Identification of the initiation codon and the sensitivity of mutants to decylubiquinone. *Biochemistry* 2003, 42(17):4800-8.
