# Supplementary material for: Characterization of oligopeptide patterns in large protein sets
Source: PubMed Central journal article supplement (PMC2231379; doi:10.1186/1471-2164-8-346), 2007-10-01
Supplement: 1471-2164-8-346-S3.pdf [file 1471-2164-8-346-S3.pdf]

| Swiss-Prot |     |   |                |                |           |           |                |              |                |                |                |                |                |                |      |
|------------|-----|---|----------------|----------------|-----------|-----------|----------------|--------------|----------------|----------------|----------------|----------------|----------------|----------------|------|
| POP        |     |   |                |                |           |           |                |              |                |                |                |                |                |                |      |
| A          |     |   | B              |                |           | E         |                |              |                |                |                |                |                |                |      |
| --LIKNG--  | 33  | 0 | 236            | --CPTCG--      | 194       | 0         | 385            | --AMHYT--    | 1477           | 0              | 1510           |                |                |                |      |
| --LKKEG--  | 32  | 0 | 360            | --ACPTC--      | 181       | 0         | 257            | --MHYTP--    | 175            | 0              | 188            |                |                |                |      |
| --YERAG--  | 45  | 0 | 160            | --KCYGG--      | 300       | 0         | 313            | --TQDMV--    | 385            | 0              | 414            |                |                |                |      |
| ---        | 29  | 0 | 324            | --CYGGD--      | 302       | 0         | 313            | YFTQD---     | 343            | 0              | 358            |                |                |                |      |
| --SCNTT--  | 31  | 0 | 142 REGION:    | 0.21 ACT_SITE: | 0.21      | --CYGIG-- | 184            | 0            | 198            | --FQGMW--      | 259            | 0              | 287            |                |      |
| --VSCNT--  | 30  | 0 | 116 ACT_SITE:  | 0.31 REGION:   | 0.26      | --AKCYG-- | 345            | 0            | 360            | ---            | 255            | 0              | 283            |                |      |
| VVSCN---   | 28  | 0 | 101 REGION:    | 0.28 ACT_SITE: | 0.28      | --FRCGF-- | 268            | 0            | 268            | --TFQOM--      | 262            | 0              | 281            |                |      |
| --IDEHD--  | 29  | 0 | 62             | --DQWGN--      | 168       | 0         | 177            | --IRYMH--    | 486            | 0              | 976 METAL:     | 0.49           |                |                |      |
| --FIDEI--  | 32  | 0 | 723            | --QWQDE--      | 217       | 0         | 708 NP_BIND:   | 0.33 METAL:  | 0.33           | --RYMHA--      | 508            | 0              | 1022 METAL:    | 0.50           |      |
| --GSGKT--  | 117 | 0 | 4513 NP_BIND:  | 0.35 DOMAIN:   | 0.24      | --IFQHF-- | 181            | 0            | 371 DOMAIN:    | 0.49           | ---            | 501            | 0              | 1008 METAL:    | 0.50 |
| --FGSGK--  | 58  | 0 | 200            | --FQHFN--      | 201       | 0         | 412 DOMAIN:    | 0.49         | --WVWNP--      | 563            | 0              | 1600           |                |                |      |
| --NGSGK--  | 34  | 0 | 1104 NP_BIND:  | 0.33 DOMAIN:   | 0.23      | --MIFQH-- | 179            | 0            | 364 DOMAIN:    | 0.49           | --SWWNP--      | 764            | 0              | 769            |      |
| --PGTGG--  | 77  | 0 | 1033 NP_BIND:  | 0.38           | --MPHPE-- | 197       | 0              | 442 DOMAIN:  | 0.46           | SAWVN---       | 530            | 0              | 538            |                |      |
| --PGVGG--  | 58  | 0 | 996 NP_BIND:   | 0.32           | --PHHEN-- | 232       | 0              | 507 METAL:   | 0.50           | --QWLVG--      | 241            | 0              | 246            |                |      |
| --STGGT--  | 36  | 0 | 520            | --TWSRR--      | 247       | 0         | 278            | --VQWLV--    | 239            | 0              | 246            |                |                |                |      |
| --ISTGG--  | 34  | 0 | 450            | IKTWS---       | 223       | 0         | 249            | --TNWDD--    | 239            | 0              | 255            |                |                |                |      |
| --VVTGG--  | 32  | 0 | 283            | --WNMGW--      | 162       | 0         | 163            | --NNDMM--    | 302            | 0              | 316            |                |                |                |      |
| --GKTVT--  | 32  | 0 | 434            | --NMGMW--      | 162       | 0         | 163            | ---          | 303            | 0              | 315            |                |                |                |      |
| DHGKT---   | 62  | 0 | 1333 NP_BIND:  | 0.39           | --KWNMG-- | 170       | 0              | 171          | --VTHIC--      | 901            | 0              | 907            |                |                |      |
| --FPGLV--  | 37  | 0 | 137 REPEAT:    | 0.26           | --HRHRY-- | 292       | 0              | 663 DOMAIN:  | 0.49           | ---            | 1364           | 0              | 1379           |                |      |
| ---        | 28  | 0 | 89 REPEAT:     | 0.35           | --PHRYP-- | 173       | 0              | 178          | --VWFQN--      | 235            | 0              | 480 DNA_BIND:  | 0.49           |                |      |
| --QFPLV--  | 41  | 0 | 91 REPEAT:     | 0.45           | --LWVGH-- | 195       | 0              | 208          | ---            | 642            | 0              | 1305 DNA_BIND: | 0.49           |                |      |
| --GMDKM--  | 29  | 0 | 54             | --QLWVG--      | 195       | 0         | 205            | --KWFQF--    | 448            | 0              | 902 DNA_BIND:  | 0.49           |                |                |      |
| ---        | 33  | 0 | 134            | RQLWV---       | 195       | 0         | 214            | --WVFNQ--    | 499            | 0              | 1011 DNA_BIND: | 0.49           |                |                |      |
| --GHVDF--  | 58  | 0 | 1247 NP_BIND:  | 0.39           | --HPFYT-- | 201       | 0              | 211          | --WLRVY--      | 534            | 0              | 547            |                |                |      |
| --GHVDF--  | 30  | 0 | 1642 NP_BIND:  | 0.48           | --HHFFT-- | 192       | 0              | 202          | --WLRVY--      | 315            | 0              | 331            |                |                |      |
| --TPGHV--  | 35  | 0 | 1550 NP_BIND:  | 0.50           | --HNMQQ-- | 257       | 0              | 544 DOMAIN:  | 0.50           | --GWIRI--      | 357            | 0              | 363            |                |      |
| --PGHYD--  | 30  | 0 | 1606 NP_BIND:  | 0.49           | --THNQV-- | 257       | 0              | 544 DOMAIN:  | 0.50           | --LHWYT--      | 214            | 0              | 217            |                |      |
| --SGKST--  | 57  | 0 | 4298 NP_BIND:  | 0.35 DOMAIN:   | 0.24      | --NMQRQ-- | 292            | 0            | 355            | --FLHWY--      | 215            | 0              | 221            |                |      |
| --GKSTL--  | 80  | 0 | 6701 NP_BIND:  | 0.37 DOMAIN:   | 0.24      | --THYGR-- | 182            | 0            | 190            | ---            | 199            | 0              | 206            |                |      |
| --GKSTF--  | 30  | 0 | 1033 NP_BIND:  | 0.36           | --HYERF-- | 301       | 0              | 331 REGION:  | 0.89           | --WSYFY--      | 226            | 0              | 455 TOPO_DOM:  | 0.50           |      |
| --VGKTT--  | 40  | 0 | 522 NP_BIND:   | 0.34           | --GWHIE-- | 226       | 0              | 261          | WYWSY---       | 232            | 0              | 470 TOPO_DOM:  | 0.49           |                |      |
| --SGKTT--  | 66  | 0 | 2215 NP_BIND:  | 0.39           | --WHIEC-- | 225       | 0              | 501 METAL:   | 0.50           | --WTVVW--      | 425            | 0              | 470            |                |      |
| --GKTTT--  | 44  | 0 | 2032 NP_BIND:  | 0.46           | --HIECS-- | 219       | 0              | 491 METAL:   | 0.50           | ---            | 428            | 0              | 480            |                |      |
| --MSKSL--  | 34  | 0 | 1890 MOTIF:    | 0.32 BINDING:  | 0.32      | --DWCIS-- | 239            | 0            | 268            | --TMVTD--      | 428            | 0              | 480            |                |      |
| --KMSKS--  | 82  | 0 | 3937 MOTIF:    | 0.33 BINDING:  | 0.33      | --WCISR-- | 262            | 0            | 295            | --GMHFR--      | 266            | 0              | 281            |                |      |
| --MSKSK--  | 41  | 0 | 1217 BINDING:  | 0.32 MOTIF:    | 0.32      | --IMEFC-- | 171            | 0            | 188            | --HGMHF--      | 266            | 0              | 270            |                |      |
| --PSTRT--  | 37  | 0 | 199            | --MEFCK--      | 172       | 0         | 184            | NHGMH---     | 258            | 0              | 269            |                |                |                |      |
| ---        | 36  | 0 | 617 REGION:    | 0.33           | --RPGWH-- | 268       | 0              | 310          | --VWVMP--      | 426            | 0              | 486            |                |                |      |
| --STRTR--  | 36  | 0 | 427 ZN_FING:   | 0.33           | --PGWHI-- | 228       | 0              | 265          | --HVWHM--      | 431            | 0              | 492            |                |                |      |
| --CPECG--  | 42  | 0 | 155 METAL:     | 0.31           | --DYRYF-- | 207       | 0              | 235          | --WHMPA--      | 428            | 0              | 492            |                |                |      |
| --CPYCG--  | 42  | 0 | 186            | --YRYFP--      | 201       | 0         | 228            | --GHPWG--    | 424            | 0              | 499            |                |                |                |      |
| --CPNCG--  | 32  | 0 | 317            | --HNGCR--      | 191       | 0         | 266            | ---          | 414            | 0              | 465            |                |                |                |      |
| --CPKCG--  | 77  | 0 | 278 METAL:     | 0.27           | --NGCRP-- | 187       | 0              | 258          | ---            | 1648           | 0              | 1676           |                |                |      |
| --CPRCG--  | 42  | 0 | 369            | --YPCDR--      | 192       | 0         | 211            | --MRWRD--    | 437            | 0              | 457            |                |                |                |      |
| --CPVCG--  | 69  | 0 | 802 NP_BIND:   | 0.37           | --GYPCD-- | 172       | 0              | 192          | --FMRWR--      | 448            | 0              | 480            |                |                |      |
| --PPGTG--  | 43  | 0 | 901 NP_BIND:   | 0.32           | --MDWME-- | 254       | 0              | 259          | PFMRN---       | 446            | 0              | 488            |                |                |      |
| --GPPGT--  | 38  | 0 | 103 REPEAT:    | 0.36           | --DNMEQ-- | 265       | 0              | 267          | --WLPFF--      | 168            | 0              | 342 TRANSMEM:  | 0.48           |                |      |
| --EPEEQ--  | 37  | 0 | 93 REPEAT:     | 0.40           | --RYCPS-- | 180       | 0              | 192          | --CWLPF--      | 194            | 0              | 410 TRANSMEM:  | 0.47           |                |      |
| --YEPFQ--  | 38  | 0 | 665 NP_BIND:   | 0.42           | --PRYCP-- | 169       | 0              | 183          | --KIMHH--      | 282            | 0              | 294            |                |                |      |
| --IDTPT--  | 52  | 0 | 2055 NP_BIND:  | 0.44           | --CYGMQ-- | 172       | 0              | 525 DOMAIN:  | 0.34 ACT_SITE: | 0.34           | ---            | 273            | 0              | 287            |      |
| --LIDTP--  | 34  | 0 | 2928 ACT_SITE: | 0.50 DOMAIN:   | 0.26      | --CLGMQ-- | 344            | 0            | 1135 DOMAIN:   | 0.34 ACT_SITE: | 0.34           | --YVPTQ--      | 377            | 0              | 409  |
| --QFHPF--  | 36  | 0 | 1187 ACT_SITE: | 0.33 DOMAIN:   | 0.32      | ---       | 187            | 0            | 206            | --VVPWT--      | 403            | 0              | 463            |                |      |
| --TQFHP--  | 29  | 0 | 308 DOMAIN:    | 0.33 ACT_SITE: | 0.31      | --DVWFD-- | 186            | 0            | 209            | ---            | 1628           | 0              | 1642           |                |      |
| ---        | 33  | 0 | 269            | --VWRQA--      | 349       | 0         | 368            | --MSFWG--    | 1532           | 0              | 1546           |                |                |                |      |
| --AARNA--  | 29  | 0 | 243            | --TVWRQ--      | 335       | 0         | 341            | --WHHTF--    | 275            | 0              | 291            |                |                |                |      |
| ---        | 67  | 0 | 1410 NP_BIND:  | 0.40           | --GCYHG-- | 176       | 0              | 192          | --HHTFY--      | 278            | 0              | 293            |                |                |      |
| --VDHGG--  | 66  | 0 | 1390 NP_BIND:  | 0.40           | --CYHGH-- | 175       | 0              | 194          | --MWSKJ--      | 212            | 0              | 237            |                |                |      |
| --HVDHG--  | 66  | 0 | 328 NP_BIND:   | 0.47           | --VCTRV-- | 266       | 0              | 307          | --QMWIS--      | 207            | 0              | 228            |                |                |      |
| --DAPGH--  | 29  | 0 | 2774 NP_BIND:  | 0.45           | --CTRVY-- | 212       | 0              | 264          | --YKETA--      | 312            | 0              | 322            |                |                |      |
| --DTPGH--  | 56  | 0 | 1694 DOMAIN:   | 0.21           | --MQFDR-- | 397       | 0              | 397          | --CDVDI--      | 208            | 0              | 262            |                |                |      |
| --LGICL--  | 40  | 0 | 1582 DOMAIN:   | 0.33 ACT_SITE: | 0.33      | --GMQFD-- | 373            | 0            | 393            | --EYFRD--      | 250            | 0              | 634            |                |      |
| ---        | 54  | 0 | 61             | --GMNPM--      | 211       | 0         | 225            | --VMHDI--    | 388            | 0              | 399            |                |                |                |      |
| --GICLG--  | 29  | 0 | 53             | --MNPMD--      | 210       | 0         | 213            | --WTQRF--    | 316            | 0              | 347            |                |                |                |      |
| --PEWRA--  | 30  | 0 | 224            | --TMDWM--      | 205       | 0         | 207            | --WMAPE--    | 270            | 0              | 694 DOMAIN:    | 0.39           |                |                |      |
| --GPEWR--  | 41  | 0 | 106 REPEAT:    | 0.37           | --ATMDW-- | 194       | 0              | 203          | --EWFYF--      | 1615           | 0              | 1630           |                |                |      |
| --EQFPF--  | 40  | 0 | 1643 BINDING:  | 0.31 MOTIF:    | 0.31      | --SEMFG-- | 180            | 0            | 236            | ---            | 187            | 0              | 494            |                |      |
| --PEQFP--  | 35  | 0 | 149            | --MIHQF--      | 273       | 0         | 606 ACT_SITE:  | 0.50         | --AYDRY--      | 225            | 0              | 890 TOPO_DOM:  | 0.25 DISULFID: | 0.22 TRANSMEM: | 0.22 |
| --NGLIT--  | 30  | 0 | 105            | --MCVND--      | 159       | 0         | 182            | --FDCIY--    | 175            | 0              | 391 METAL:     | 0.47           |                |                |      |
| --EGKSP--  | 33  | 0 | 418            | --GCSMC--      | 158       | 0         | 512 METAL:     | 0.66         | --CEEMI--      | 202            | 0              | 409 DISULFID:  | 0.49           |                |      |
| --RYKEL--  | 32  | 0 | 59             | --CYVTP--      | 166       | 0         | 204            | --MFRPF--    | 168            | 0              | 187            |                |                |                |      |
| --RGAPQ--  | 29  | 0 | 309            | --YFVHS--      | 161       | 0         | 331 DOMAIN:    | 0.54         | --MYVAI--      | 235            | 0              | 256            |                |                |      |
| --GDEVI--  | 34  | 0 | 1705 DOMAIN:   | 0.49           | --EMEVM-- | 258       | 0              | 327          | --PMYFF--      | 276            | 0              | 574 TRANSMEM:  | 0.47           |                |      |
| --RSIEG--  | 40  | 0 | 314            | --CEKCG--      | 202       | 0         | 397            | --WNIGI--    | 506            | 0              | 523            |                |                |                |      |
| --LDEPT--  | 54  | 0 | 220            | --QRVWG--      | 163       | 0         | 187            | --MEKIW--    | 295            | 0              | 310            |                |                |                |      |
| --AKKLN--  | 29  | 0 | 115            | --CFRDE--      | 234       | 0         | 265            | --QNRRM--    | 317            | 0              | 645 DNA_BIND:  | 0.48           |                |                |      |
| --ATPAD--  | 29  | 0 | 1146           | --QRLRC--      | 269       | 0         | 583 DOMAIN:    | 0.49         | --YGCYC--      | 252            | 0              | 1139 DISULFID: | 0.53 METAL:    | 0.21           |      |
| --GRGNR--  | 30  | 0 | 141 NP_BIND:   | 0.40           | --GCTN--  | 168       | 0              | 465 METAL:   | 0.45           | --NHSFM--      | 242            | 0              | 735 METAL:     | 0.33 TOPO_DOM: | 0.33 |
| --RGITI--  | 43  | 0 | 170            | --QMHAN--      | 178       | 0         | 180            | ---          | 304            | 0              | 311            |                |                |                |      |
| --NKVDR--  | 29  | 0 | 410            | --YYQPE--      | 181       | 0         | 570 DOMAIN:    | 0.32 MOTIF:  | 0.32           | --IHWVH--      | 430            | 0              | 484            |                |      |
| --EIVDA--  | 33  | 0 | 150            | --HHNVG--      | 222       | 0         | 479 DOMAIN:    | 0.49         | --HYYSG--      | 265            | 0              | 266            |                |                |      |
| --GGGSN--  | 34  | 0 | 99             | --TTTPW--      | 224       | 0         | 287            | --YFPHF--    | 241            | 0              | 272            |                |                |                |      |
| --QKSID--  | 33  | 0 | 354            | --HNNHS--      | 190       | 0         | 224            | --ITRMV--    | 200            | 0              | 205            |                |                |                |      |
| --KQKID--  | 33  | 0 | 258            | --SYHDV--      | 203       | 0         | 212            | --CQLFW--    | 548            | 0              | 549            |                |                |                |      |
| --MTDSG--  | 33  | 0 | 197            | --SWGYQ--      | 191       | 0         | 392 ACT_SITE:  | 0.48         | ---            | 262            | 0              | 528 TOPO_DOM:  | 0.50           |                |      |
| --IKALK--  | 36  | 0 | 160            | --YNFED--      | 158       | 0         | 230            | --YVWVD--    | 233            | 0              | 241            |                |                |                |      |
| --QADAA--  | 30  | 0 | 364            | --YYDYD--      | 173       | 0         | 557 DOMAIN:    | 0.32 MOTIF:  | 0.32           | --CIPCG--      | 174            | 0              | 843 METAL:     | 0.65           |      |
| ---        | 31  | 0 | 68             | --FYMVG--      | 162       | 0         | 193            | --QRJHT--    | 669            | 0              | 940 ZN_FING:   | 0.71           |                |                |      |
| --RLGIP--  | 32  | 0 | 231            | --MRTFH--      | 253       | 0         | 288            | --CQGNQ--    | 247            | 0              | 256            |                |                |                |      |
| --EAVKR--  | 47  | 0 | 306            | --QFMDQ--      | 282       | 0         | 309            | --LAHYC--    | 331            | 0              | 339            |                |                |                |      |
| --VVYRE--  | 29  | 0 | 64             | --TYQVP--      | 186       | 0         | 240            | --NYGWI--    | 393            | 0              | 400            |                |                |                |      |
| --ISRQR--  | 38  | 0 | 314            | --PVFPM--      | 179       | 0         | 190            | --PYKCN--    | 218            | 0              | 334 ZN_FING:   | 0.64           |                |                |      |
| --AEYLA--  | 30  | 0 | 220            | --NYFYF--      | 170       | 0         | 185            | --RCYHI--    | 266            | 0              | 270            |                |                |                |      |
| --EKYRP--  | 45  | 0 | 117            | --WMSHG--      | 160       | 0         | 322 DOMAIN:    | 0.50         | --FHDHT--      | 167            | 0              | 333 TRANSMEM:  | 0.49 TOPO_DOM: | 0.49           |      |
| --EPVVT--  | 31  | 0 | 119            | --QFHPE--      | 644       | 0         | 2928 ACT_SITE: | 0.50 DOMAIN: | 0.26           | ---            | 208            | 0              | 213            |                |      |
| --MPVAA--  | 30  | 0 | 108            | --FVLWK--      | 161       | 0         | 174            | --CIVLH--    | 168            | 0              | 335 METAL:     | 0.50           |                |                |      |
| --TLVIV--  | 30  | 0 | 130            | --GMVHP--      | 158       | 0         | 182            | ---          | 188            | 0              | 191            |                |                |                |      |
| --ALRDA--  | 34  | 0 | 515            | --WDVGH--      | 187       | 0         | 190            | --VEYCP--    | 167            | 0              | 368 METAL:     | 0.48           |                |                |      |
| ---        | 29  | 0 | 202            | --TTNSC--      | 205       | 0         | 229            | --HRAMH--    | 435            | 0              | 1486 BINDING:  | 0.33 ACT_SITE: | 0.33           |                |      |
| --TLAEN--  | 29  | 0 | 202            | ---            | 205       | 0         | 229            | --CPTNC--    | 168            | 0              | 387 METAL:     | 0.48           |                |                |      |

| Swiss-Prot |    |      |     |           |      |           |     |           |      |           |      |           |           |           |           |           |      |    |    |    |
|------------|----|------|-----|-----------|------|-----------|-----|-----------|------|-----------|------|-----------|-----------|-----------|-----------|-----------|------|----|----|----|
| NEP        |    |      |     |           |      |           |     |           |      |           |      |           |           |           |           |           |      |    |    |    |
| A          |    |      | B   |           |      | E         |     |           |      |           |      |           |           |           |           |           |      |    |    |    |
| --LLVRL--  | 16 | 0    | 188 | --GLGPP-- | 53   | 0         | 126 | --PDKGP-- | 28   | 0         | 13   |           |           |           |           |           |      |    |    |    |
| --LLVAE--  | 16 | 0    | 308 | --GVGPP-- | 37   | 0         | 62  | --GPKP--  | 36   | 0         | 10   |           |           |           |           |           |      |    |    |    |
| --LVALI--  | 18 | 0    | 463 | TRANSMEM: | 0.31 | --LGPPT-- | 37  | 0         | 71   | --AYGPL-- | 30   | 0         | 30        |           |           |           |      |    |    |    |
| --IILIK--  | 15 | 0.01 | 43  | --ESFRA-- | 35   | 0         | 72  | --AIYPL-- | 29   | 0         | 57   |           |           |           |           |           |      |    |    |    |
| --ILLKE--  | 15 | 0    | 202 | ARESP--   | 34   | 0         | 42  | --IDPGF-- | 31   | 0         | 27   |           |           |           |           |           |      |    |    |    |
| --IVLLK--  | 18 | 0    | 192 | --EPVVK-- | 36   | 0         | 58  | --IDPGG-- | 30   | 0         | 7    |           |           |           |           |           |      |    |    |    |
| --GGKEL--  | 19 | 0.01 | 148 | --VEPPG-- | 35   | 0         | 41  | --NDPGG-- | 28   | 0         | 7    |           |           |           |           |           |      |    |    |    |
| --AAGKE--  | 16 | 0.02 | 169 | --VIVLY-- | 35   | 0         | 54  | TRANSMEM: | 0.28 | 29        | 0    | 6         |           |           |           |           |      |    |    |    |
| --EGEAS--  | 20 | 0.03 | 125 | --IVLKF-- | 50   | 0         | 11  | --GIFPN-- | 29   | 0         | 24   |           |           |           |           |           |      |    |    |    |
| --GAASL--  | 16 | 0.03 | 311 | --IVLRM-- | 35   | 0         | 136 | TRANSMEM: | 0.28 | 32        | 0    | 103       |           |           |           |           |      |    |    |    |
| --LLEED--  | 16 | 0    | 350 | --GQKDE-- | 37   | 0         | 34  | --GMLSE-- | 32   | 0         | 18   |           |           |           |           |           |      |    |    |    |
| --LVEDE--  | 15 | 0    | 153 | --GPEDE-- | 41   | 0         | 74  | --GYARE-- | 28   | 0         | 32   |           |           |           |           |           |      |    |    |    |
| --AGEGL--  | 23 | 0.01 | 265 | --TAHLV-- | 41   | 0         | 32  | --AREPT-- | 30   | 0         | 10   |           |           |           |           |           |      |    |    |    |
| BRAGE---   | 15 | 0.02 | 111 | --KRAHL-- | 35   | 0         | 22  | --IMLKS-- | 31   | 0         | 27   |           |           |           |           |           |      |    |    |    |
| --DAGEK--  | 16 | 0.08 | 85  | --TRKEG-- | 40   | 0         | 34  | --IMLDL-- | 35   | 0         | 25   |           |           |           |           |           |      |    |    |    |
| --AEILL--  | 18 | 0    | 228 | --RKETT-- | 36   | 0         | 29  | NLIML---  | 29   | 0         | 6    |           |           |           |           |           |      |    |    |    |
| --EIELV--  | 17 | 0    | 120 | --LYIRA-- | 35   | 0         | 26  | --FKIEA-- | 28   | 0         | 25   |           |           |           |           |           |      |    |    |    |
| --EIALI--  | 16 | 0    | 147 | --LYLIL-- | 34   | 0         | 19  | --FPREA-- | 33   | 0         | 19   |           |           |           |           |           |      |    |    |    |
| --EIVLI--  | 15 | 0    | 118 | --LLYIK-- | 46   | 0         | 42  | DOMAIN:   | 0.21 | 28        | 0    | 34        |           |           |           |           |      |    |    |    |
| --EIGLL--  | 15 | 0    | 223 | --FVILL-- | 57   | 0         | 55  | TRANSMEM: | 0.29 | 28        | 0    | 32        |           |           |           |           |      |    |    |    |
| --IEKKK--  | 20 | 0    | 119 | --FVIRI-- | 37   | 0         | 22  | DOMAIN:   | 0.23 | 32        | 0    | 59        |           |           |           |           |      |    |    |    |
| --YEKKL--  | 15 | 0.06 | 147 | --KIEGP-- | 37   | 0         | 17  | COMPBIA:  | 0.24 | 30        | 0    | 27        |           |           |           |           |      |    |    |    |
| --VGLIE--  | 15 | 0.01 | 94  | --KNEGG-- | 38   | 0         | 31  | --NDQGL-- | 30   | 0         | 27   |           |           |           |           |           |      |    |    |    |
| AAVGL---   | 15 | 0    | 561 | --AAVHI-- | 40   | 0         | 32  | --DAGLM-- | 28   | 0         | 17   |           |           |           |           |           |      |    |    |    |
| --KLEVL--  | 15 | 0    | 280 | --ILAVH-- | 46   | 0         | 32  | --AQPGV-- | 28   | 0         | 33   |           |           |           |           |           |      |    |    |    |
| --LLEVL--  | 19 | 0    | 177 | --NKTAG-- | 36   | 0         | 43  | --FGVRD-- | 29   | 0         | 34   |           |           |           |           |           |      |    |    |    |
| --LEVEP--  | 16 | 0.05 | 114 | --NKSAG-- | 37   | 0         | 35  | --VLVVM-- | 29   | 0         | 3    |           |           |           |           |           |      |    |    |    |
| --KILLL--  | 18 | 0    | 510 | --NEGAG-- | 47   | 0         | 33  | DOMAIN:   | 0.33 | 29        | 0    | 5         |           |           |           |           |      |    |    |    |
| --VKILI--  | 17 | 0    | 81  | --FIKIV-- | 39   | 0         | 44  | DOMAIN:   | 0.36 | 28        | 0    | 15        |           |           |           |           |      |    |    |    |
| --VLIII--  | 15 | 0    | 132 | TRANSMEM: | 0.33 | --FIKI--  | 44  | 0         | 36   | DOMAIN:   | 0.28 | 0.22      | KLHIE---  | 28        | 0         | 16        |      |    |    |    |
| --LIIIV--  | 18 | 0    | 116 | TRANSMEM: | 0.41 | --IFIV--  | 39  | 0         | 65   | DOMAIN:   | 0.29 | 28        | 0         | 8         |           |           |      |    |    |    |
| --LIIII--  | 21 | 0    | 199 | TRANSMEM: | 0.39 | --GEDNT-- | 37  | 0         | 18   | --EPNQS-- | 28   | 0         | 13        |           |           |           |      |    |    |    |
| --LIIII--  | 17 | 0    | 297 | TRANSMEM: | 0.34 | --GEDRT-- | 37  | 0         | 28   | TOPO_DOM: | 0.21 | 29        | 0         | 1         |           |           |      |    |    |    |
| --LTIIV--  | 17 | 0.04 | 195 | TRANSMEM: | 0.34 | --EDTTG-- | 35  | 0         | 51   | --GPKQS-- | 30   | 0         | 9         | REGION:   | 0.22      | 30        | 0    | 25 |    |    |
| --LSIII--  | 16 | 0    | 165 | TRANSMEM: | 0.25 | --RAPPE-- | 34  | 0         | 73   | --RFFEL-- | 30   | 0         | 25        | SARFF---  | 30        | 0         | 40   |    |    |    |
| --LEIII--  | 16 | 0.01 | 124 | --VRAPP-- | 37   | 0         | 43  | --AQAPP-- | 40   | 0         | 132  | --CELKL-- | 32        | 0         | 13        |           |      |    |    |    |
| --EELRL--  | 15 | 0    | 431 | --ARSPP-- | 36   | 0         | 81  | --ARAPP-- | 50   | 0         | 106  | --CNLKL-- | 30        | 0         | 4         |           |      |    |    |    |
| --EETKL--  | 15 | 0.04 | 146 | --RGPPA-- | 49   | 0         | 77  | --MLLVK-- | 36   | 0         | 58   | --VEVGY-- | 29        | 0         | 14        |           |      |    |    |    |
| --KFLII--  | 16 | 0.05 | 37  | --MLVLR-- | 35   | 0         | 11  | TRANSMEM: | 0.36 | 36        | 0    | 51        | --VDTGY-- | 28        | 0         | 20        |      |    |    |    |
| --VLIIV--  | 16 | 0    | 189 | TRANSMEM: | 0.33 | --TRASP-- | 36  | 0         | 36   | --LYFEL-- | 38   | 0         | 15        | --TEVVL-- | 31        | 0         | 44   |    |    |    |
| --LLEIL--  | 16 | 0    | 141 | --DRAEP-- | 35   | 0         | 11  | --RAGPP-- | 34   | 0         | 92   | --GVLK--  | 32        | 0         | 18        |           |      |    |    |    |
| --LELRI--  | 15 | 0.01 | 91  | --RAGPP-- | 48   | 0         | 15  | --PIDVG-- | 48   | 0         | 15   | --FMLEL-- | 29        | 0         | 13        |           |      |    |    |    |
| --EVLVL--  | 15 | 0    | 272 | --PIKGG-- | 55   | 0         | 16  | --PIKGG-- | 35   | 0         | 31   | --FFLEQ-- | 30        | 0         | 9         | VAR_SEQ:  | 0.22 | 29 | 0  | 13 |
| --RLVLV--  | 15 | 0    | 379 | --DANED-- | 35   | 0         | 16  | --DANED-- | 35   | 0         | 16   | --KFIIL-- | 40        | 0         | 18        |           |      |    |    |    |
| --ABGVG--  | 17 | 0    | 197 | --DAQSD-- | 36   | 0         | 16  | --ARGPP-- | 35   | 0         | 161  | --ESFML-- | 34        | 0         | 10        |           |      |    |    |    |
| --EEDVG--  | 18 | 0.01 | 105 | --ARGDP-- | 49   | 0         | 76  | --ARGDP-- | 49   | 0         | 76   | --GKIQG-- | 31        | 0         | 20        |           |      |    |    |    |
| --EIVIE--  | 15 | 0    | 62  | --PRGAP-- | 35   | 0         | 122 | --PRGAP-- | 35   | 0         | 122  | --SKYVT-- | 33        | 0         | 28        |           |      |    |    |    |
| --EIVII--  | 16 | 0    | 46  | --IIRV--  | 50   | 0         | 23  | --IIRV--  | 50   | 0         | 23   | --TEMLI-- | 29        | 0         | 6         |           |      |    |    |    |
| --LIVIL--  | 19 | 0.01 | 284 | TRANSMEM: | 0.36 | --VIIL--  | 54  | 0         | 13   | --QERDD-- | 30   | 0         | 24        |           |           |           |      |    |    |    |
| --RGELI--  | 16 | 0.03 | 78  | --GPREE-- | 40   | 0         | 54  | --GPREE-- | 40   | 0         | 54   | --QERDD-- | 30        | 0         | 24        |           |      |    |    |    |
| --RLELV--  | 15 | 0.01 | 179 | --EPRPE-- | 35   | 0         | 42  | --EPRPE-- | 35   | 0         | 42   | --KGLHA-- | 29        | 0         | 34        |           |      |    |    |    |
| --LILLE--  | 16 | 0    | 254 | --EDTVD-- | 39   | 0         | 42  | --EDTVD-- | 39   | 0         | 42   | --ARDTK-- | 32        | 0         | 177       |           |      |    |    |    |
| --LILLV--  | 15 | 0    | 518 | TRANSMEM: | 0.30 | --DTKDR-- | 37  | 0         | 20   | --CELDL-- | 29   | 0         | 13        |           |           |           |      |    |    |    |
| --LILED--  | 16 | 0    | 195 | --GPFLL-- | 38   | 0         | 76  | --GPFLL-- | 38   | 0         | 76   | --LCKLT-- | 30        | 0         | 9         |           |      |    |    |    |
| --LVLLE--  | 15 | 0    | 345 | --PPLFL-- | 37   | 0         | 144 | --PPLFL-- | 37   | 0         | 144  | --EYQSE-- | 29        | 0         | 9         |           |      |    |    |    |
| --LIIIV--  | 17 | 0    | 168 | TRANSMEM: | 0.43 | --VVYIL-- | 36  | 0         | 49   | --QVSPF-- | 30   | 0         | 14        |           |           |           |      |    |    |    |
| --LIIIV--  | 17 | 0    | 216 | TRANSMEM: | 0.28 | --VVYID-- | 34  | 0         | 36   | --FMSLK-- | 30   | 0         | 7         |           |           |           |      |    |    |    |
| --IIVEL--  | 15 | 0    | 69  | --IYIRL-- | 35   | 0         | 26  | TOPO_DOM: | 0.35 | 35        | 0    | 19        | --SEVRG-- | 28        | 0         | 19        |      |    |    |    |
| --VGAE--   | 21 | 0    | 181 | --IYIKL-- | 48   | 0         | 21  | --IYIKL-- | 48   | 0         | 21   | --TKGVR-- | 32        | 0         | 23        |           |      |    |    |    |
| EVGAE---   | 17 | 0    | 178 | --IIRI--  | 41   | 0         | 18  | DOMAIN:   | 0.22 | 35        | 0    | 18        | --GEPNE-- | 29        | 0         | 18        |      |    |    |    |
| --GAEEE--  | 16 | 0.08 | 217 | --IIRI--  | 37   | 0         | 13  | VAR_SEQ:  | 0.23 | 35        | 0    | 25        | --SMLAP-- | 31        | 0         | 37        |      |    |    |    |
| --KPKIE--  | 19 | 0    | 48  | --KIGMG-- | 35   | 0         | 25  | --KIGMG-- | 35   | 0         | 25   | --VGLQ--  | 29        | 0         | 29        |           |      |    |    |    |
| --IKIE--   | 17 | 0.01 | 99  | --GPAES-- | 44   | 0         | 67  | --GPAES-- | 44   | 0         | 67   | --DKQGA-- | 32        | 0         | 25        |           |      |    |    |    |
| --LKVIV--  | 15 | 0    | 132 | --KLVIY-- | 35   | 0         | 32  | --KLVIY-- | 35   | 0         | 32   | --CSCCC-- | 40        | 0         | 5         | COMPBIA:  | 0.40 | 36 | 0  | 4  |
| --EKKIV--  | 15 | 0    | 132 | --LPIVR-- | 38   | 0         | 118 | DOMAIN:   | 0.28 | 38        | 0    | 17        | --PRFKA-- | 28        | 0         | 38        |      |    |    |    |
| --VVLVD--  | 16 | 0.01 | 228 | --LVIVR-- | 43   | 0         | 29  | TRANSMEM: | 0.28 | 38        | 0    | 17        | --PTYVS-- | 36        | 0         | 17        |      |    |    |    |
| --LVVIE--  | 16 | 0    | 131 | --VVVIL-- | 43   | 0         | 29  | TRANSMEM: | 0.28 | 38        | 0    | 17        | --AIAFE-- | 32        | 0         | 42        |      |    |    |    |
| --LLLIE--  | 19 | 0    | 121 | --FAVGP-- | 37   | 0         | 33  | --FAVGP-- | 37   | 0         | 33   | --GLQTY-- | 32        | 0         | 14        |           |      |    |    |    |
| --KLLVI--  | 15 | 0    | 120 | --GGTNE-- | 38   | 0         | 17  | --GGTNE-- | 38   | 0         | 17   | --NPVGR-- | 28        | 0         | 27        | TOPO_DOM: | 0.44 | 28 | 0  | 16 |
| --LLIKL--  | 17 | 0    | 165 | --EGSLM-- | 35   | 0         | 43  | TOPO_DOM: | 0.28 | 35        | 0    | 22        | --KRAQP-- | 28        | 0         | 16        |      |    |    |    |
| --LIIKL--  | 16 | 0    | 179 | --GDEGN-- | 39   | 0         | 21  | --GDEGN-- | 39   | 0         | 21   | --DTQAD-- | 28        | 0         | 25        |           |      |    |    |    |
| --LIIIE--  | 20 | 0    | 60  | --NKEEP-- | 35   | 0         | 22  | --NKEEP-- | 35   | 0         | 22   | --FIAVR-- | 29        | 0         | 40        |           |      |    |    |    |
| --LIIIE--  | 17 | 0    | 92  | --ELEMG-- | 35   | 0         | 23  | --ELEMG-- | 35   | 0         | 23   | --PARNE-- | 28        | 0         | 14        |           |      |    |    |    |
| --IVVIV--  | 16 | 0    | 152 | --AEPRK-- | 38   | 0         | 55  | --AEPRK-- | 38   | 0         | 55   | --LCPVE-- | 28        | 0         | 13        |           |      |    |    |    |
| --IVLIV--  | 15 | 0    | 183 | TRANSMEM: | 0.37 | --MAPGG-- | 39  | 0         | 31   | --MAPGG-- | 39   | 0         | 31        | --LATPH-- | 29        | 0         | 40   |    |    |    |
| --LVIVL--  | 18 | 0    | 161 | TRANSMEM: | 0.40 | --ARDQS-- | 36  | 0         | 19   | REGION:   | 0.26 | 28        | 0         | 12        | VAR_SEQ:  | 0.25      | 28   | 0  | 21 |    |
| --VLVIV--  | 17 | 0    | 340 | TRANSMEM: | 0.36 | --VLIQF-- | 37  | 0         | 51   | --VLIQF-- | 37   | 0         | 51        | --LTFRF-- | 29        | 0         | 21   |    |    |    |
| --ILVLE--  | 19 | 0    | 133 | --ETIGP-- | 36   | 0         | 22  | --ETIGP-- | 36   | 0         | 22   | --HKESI-- | 32        | 0         | 57        |           |      |    |    |    |
| --ILILE--  | 15 | 0    | 101 | --LIVYE-- | 37   | 0         | 39  | REGION:   | 0.36 | 37        | 0    | 39        | --GMGSE-- | 31        | 0         | 16        |      |    |    |    |
| --LVIEI--  | 15 | 0.01 | 54  | --AHIV--  | 35   | 0         | 45  | DOMAIN:   | 0.24 | 35        | 0    | 26        | --LNIMK-- | 28        | 0         | 26        |      |    |    |    |
| --LIEIE--  | 19 | 0.04 | 291 | --DMLAI-- | 45   | 0         | 13  | --DMLAI-- | 45   | 0         | 13   | --LMPDL-- | 29        | 0         | 9         |           |      |    |    |    |
| --AATEE--  | 16 | 0.01 | 244 | --KEQDG-- | 36   | 0         | 21  | --KEQDG-- | 36   | 0         | 21   | --DLAYD-- | 28        | 0         | 17        |           |      |    |    |    |
| --DGVVG--  | 17 | 0.02 | 89  | --IGVRK-- | 37   | 0         | 36  | --IGVRK-- | 37   | 0         | 36   | --PKNKG-- | 28        | 0         | 8         |           |      |    |    |    |
| --ILTIK--  | 15 | 0.04 | 85  | REGION:   | 0.25 | --NSVDG-- | 36  | 0         | 38   | TOPO_DOM: | 0.24 | 31        | 0         | 17        | --LRFQG-- | 31        | 0    | 17 |    |    |
| --KEEER--  | 17 | 0    | 268 | --NVGIE-- | 44   | 0         | 10  | --NVGIE-- | 44   | 0         | 10   | --GKSHY-- | 28        | 0         | 32        | NP_BIND:  | 0.31 | 28 | 0  | 35 |
| --EKGAL--  | 17 | 0.03 | 220 | --DQGDG-- | 37   | 0         | 24  | DOMAIN:   | 0.25 | 37        | 0    | 18        | --LIRIY-- | 32        | 0         | 35        |      |    |    |    |
| --EAAAI--  | 19 | 0.03 | 320 | --SEVGY-- | 34   | 0         | 18  | --SEVGY-- | 34   | 0         | 18   | --LKFYA-- | 33        | 0         | 10        |           |      |    |    |    |
| --EPIGK--  | 15 | 0.13 | 45  | --LMVEI-- | 35   | 0         | 22  | --LMVEI-- | 35   | 0         | 22   | --SEPYA-- | 30        | 0         | 10        |           |      |    |    |    |
| --ALKVV--  | 15 | 0.01 | 200 | --FILIP-- | 34   | 0         | 27  | TRANSMEM: | 0.26 | 34        | 0    | 15        | --KQDRS-- | 28        | 0         | 15        |      |    |    |    |
| --ETELE--  | 15 | 0.01 | 214 | --GGVQD-- | 46   | 0         | 19  | TOPO_DOM: | 0.37 | 46        | 0    | 15        | --MFVEL-- | 30        | 0         | 15        |      |    |    |    |
| --ILQVA--  | 15 | 0.01 | 316 | --DTEGD-- | 35   | 0         | 27  | --DTEGD-- | 35   | 0         | 27   | --EVFIL-- | 31        | 0         | 41        |           |      |    |    |    |
| --EGEOI--  | 16 | 0    | 127 | --PIQIL-- | 39   | 0         | 46  | --PIQIL-- | 39   | 0         | 46   | --GQDDA-- | 34        | 0         | 55        |           |      |    |    |    |
| --LKLIL--  | 15 | 0    | 230 | --EKDNA-- | 38   | 0         | 77  | COILED:   | 0.34 | 38        | 0    | 27        | --RNNAS-- | 31        | 0         | 27        |      |    |    |    |
| --VREGA--  | 15 | 0.03 | 245 | --GKASQ-- | 39   | 0         | 52  | DOMAIN:   | 0.33 | 39        | 0    | 16        | --GIRTI-- | 31        | 0         | 70        |      |    |    |    |
| --VLIEL--  | 17 | 0    | 92  | --DKTED-- | 38   | 0         | 43  | --DKTED-- | 38   | 0         | 43   | --ARPLM-- | 28        | 0         | 16        |           |      |    |    |    |
| --LIETK--  | 15 | 0.02 | 112 | --VHLKA-- | 37   | 0         | 37  | --VHLKA-- | 37   | 0         | 37   | --IILYK-- | 32        | 0         | 12        |           |      |    |    |    |
| --KKKEA--  | 16 | 0.01 | 208 |           |      |           |     |           |      |           |      |           |           |           |           |           |      |    |    |    |
| --GARGE--  | 15 | 0.02 | 194 |           |      |           |     |           |      |           |      |           |           |           |           |           |      |    |    |    |
| --IITIK--  | 17 | 0    | 42  |           |      |           |     |           |      |           |      |           |           |           |           |           |      |    |    |    |

| Swiss-Prot |    |   |                   |           |     |   |                               |           |      |   |                     |
|------------|----|---|-------------------|-----------|-----|---|-------------------------------|-----------|------|---|---------------------|
| ORP        |    |   |                   |           |     |   |                               |           |      |   |                     |
| A          |    |   |                   | B         |     |   |                               | E         |      |   |                     |
| -INWGD--   | 10 | 0 | 14                | --RMEFP-- | 106 | 0 | 109                           | --MFFIC-- | 1060 | 0 | 1071                |
| -INWYT--   | 11 | 0 | 20 DOMAIN: 0.35   | --NIMEF-- | 178 | 0 | 184                           | --FFICL-- | 304  | 0 | 315                 |
| -ARWYC--   | 13 | 0 |                   | --MEFCK-- | 172 | 0 | 184                           | --FFICL-- | 1087 | 0 | 1103                |
| --RNYCK-   | 10 | 0 | 15                | --TQWGD-- | 111 | 0 | 330 NP_BIND: 0.33 METAL: 0.33 | --FICLY-  | 452  | 0 | 461                 |
| --WYCKE    | 11 | 0 | 19                | --SDQWG-- | 144 | 0 | 155                           | --FAPHF-- | 1257 | 0 | 2525 METAL: 0.50    |
| -WEMRV--   | 11 | 0 | 13                | --QWGNL-- | 139 | 0 | 145                           | --APHFI-- | 980  | 0 | 1973 METAL: 0.50    |
| HWEMR--    | 12 | 0 | 14                | --DQWGN-- | 168 | 0 | 177                           | --PHFIL-- | 990  | 0 | 1989 METAL: 0.49    |
| -DPHKM--   | 12 | 0 | 25 BINDING: 0.48  | --PGCSM-- | 130 | 0 | 255 METAL: 0.49               | --YGLII-- | 347  | 0 | 352                 |
| --PHKMG-   | 12 | 0 | 25 BINDING: 0.48  | --HFCSM-- | 142 | 0 | 118                           | --GWLIR-- | 357  | 0 | 363                 |
| -HTSCG--   | 10 | 0 | 23 METAL: 0.39    | --YQIQT-- | 109 | 0 | 109                           | --YGLLI-- | 763  | 0 | 771                 |
| BHTSC--    | 10 | 0 | 20 METAL: 0.45    | RYYQI--   | 125 | 0 | 131                           | --NYGLI-- | 393  | 0 | 400                 |
| -DTWMD--   | 11 | 0 | 11                | --CGRYE-- | 124 | 0 | 255 BINDING: 0.49             | --AWNPF-- | 533  | 0 | 540                 |
| --TWMDS-   | 11 | 0 | 13                | --GHYEG-- | 104 | 0 | 201 BINDING: 0.45             | --SWWPF-- | 764  | 0 | 769                 |
| -WYPLD--   | 10 | 0 | 14                | --FFFRW-- | 109 | 0 | 110                           | --WNFGS-- | 1646 | 0 | 1668                |
| -VYIGC--   | 12 | 0 | 13                | --FGFRG-- | 245 | 0 | 249                           | --YKFTW-- | 312  | 0 | 322                 |
| -RYWGI--   | 16 | 0 | 16                | --MIEGP-- | 125 | 0 | 129                           | --KETWN-- | 410  | 0 | 416                 |
| -WYNGP--   | 12 | 0 | 15                | --MIGDP-- | 132 | 0 | 138                           | --LETWN-- | 320  | 0 | 329                 |
| -YHYDH--   | 11 | 0 | 13                | --ENRFM-- | 143 | 0 | 145                           | --ETWNI-- | 1151 | 0 | 1165                |
| -ECQAM--   | 11 | 0 | 12                | --RFRMHV  | 120 | 0 | 127                           | --ICLFL-- | 377  | 0 | 392                 |
| -HMSYA--   | 12 | 0 | 17                | --MGWMI-- | 105 | 0 | 105                           | --CLFLH-- | 472  | 0 | 958 METAL: 0.49     |
| -FIEWQ--   | 10 | 0 | 13                | --NMGMW-- | 162 | 0 | 163                           | --QCLFW-- | 548  | 0 | 549                 |
| -WMTWK--   | 10 | 0 | 17 HELIX: 0.24    | --TMDWM-- | 205 | 0 | 207                           | --HCDKL-- | 313  | 0 | 651 METAL: 0.47     |
| -WRCKT--   | 23 | 0 | 23                | --PHTFN-- | 115 | 0 | 120                           | --LHCDK-- | 312  | 0 | 649 METAL: 0.47     |
| --YPIILW-  | 10 | 0 | 24 TRANSMEM: 0.46 | --HDFND-- | 109 | 0 | 114                           | --CDKLI-- | 312  | 0 | 349                 |
| -YHDPG--   | 10 | 0 | 12                | --WNGYV-- | 119 | 0 | 121                           | --QNRMR-- | 317  | 0 | 645 DNA_BIND: 0.48  |
| -MTSQC--   | 11 | 0 | 13                | --PWNGY-- | 112 | 0 | 113                           | WFQNR--   | 642  | 0 | 1305 DNA_BIND: 0.49 |
| -EYVWV--   | 11 | 0 | 16                | MPWNG--   | 106 | 0 | 107                           | --NYTFA-- | 793  | 0 | 808                 |
| -QPCIR--   | 11 | 0 | 11                | --RDVHP-- | 147 | 0 | 155                           | FDNVT--   | 819  | 0 | 858                 |
| -MQIGM--   | 10 | 0 | 17                | ---VHPH   | 118 | 0 | 119                           | --WGGFS-- | 1588 | 0 | 1588                |
| -CFREV--   | 12 | 0 | 26 METAL: 0.46    | --VGHET-- | 116 | 0 | 118                           | WIWGG--   | 1318 | 0 | 1334                |
| -IYMAY--   | 10 | 0 | 18                | --GHQTR-- | 119 | 0 | 128                           | --VMHDY-- | 388  | 0 | 399                 |
| -WYFSQ--   | 12 | 0 | 14                | --ANMQV-- | 144 | 0 | 150                           | PIVMH--   | 388  | 0 | 396                 |
| -ACPHR--   | 12 | 0 | 13                | --GANMQ-- | 145 | 0 | 148                           | --SAWNN-- | 530  | 0 | 538                 |
| -HLTMY--   | 10 | 0 | 12                | IQANM--   | 119 | 0 | 124                           | --ISAWN-- | 524  | 0 | 531                 |
| -TAMNK--   | 13 | 0 | 30 MOTIF: 0.43    | --RHHTF-- | 139 | 0 | 142                           | --SSWNN-- | 757  | 0 | 758                 |
| -WCRGG--   | 11 | 0 | 24 REGION: 0.50   | ---HHFE-  | 150 | 0 | 159                           | --HYCRD-- | 372  | 0 | 386                 |
| -VNHCV--   | 10 | 0 | 11                | --VAHIW-- | 127 | 0 | 134                           | --HICRD-- | 1364 | 0 | 1379                |
| -HHNTD--   | 19 | 0 | 20                | ---AHIF-  | 132 | 0 | 140                           | --THICR-- | 922  | 0 | 931                 |
| -HLCHV--   | 14 | 0 | 15                | ---HIWFL- | 129 | 0 | 135                           | --AHICR-- | 406  | 0 | 425                 |
| -MMAHH--   | 10 | 0 | 10                | --GWMHD-- | 122 | 0 | 124                           | --IRYMH-- | 486  | 0 | 976 METAL: 0.49     |
| -ISHIM--   | 10 | 0 | 14                | --GSHYD-- | 200 | 0 | 203                           | --RYMHA-- | 508  | 0 | 1022 METAL: 0.50    |
| -QGDHR--   | 14 | 0 | 17                | --KWNMG-- | 170 | 0 | 171                           | ---YMHAN- | 501  | 0 | 1008 METAL: 0.50    |
| -KHKYD--   | 10 | 0 | 14                | ---WNGW-  | 162 | 0 | 163                           | --YKCEE-- | 317  | 0 | 400 ZN_FING: 0.77   |
| -GPTQY--   | 11 | 0 | 17                | --IDWQG-- | 153 | 0 | 297 DOMAIN: 0.47              | -PYKCE--  | 346  | 0 | 459 ZN_FING: 0.74   |
| -WVMDR--   | 10 | 0 | 12                | ---DWQA-  | 137 | 0 | 268 DOMAIN: 0.47              | KPYKC--   | 996  | 0 | 1361 ZN_FING: 0.72  |
| -FGKWD--   | 11 | 0 | 14                | --LPHRY-- | 142 | 0 | 149                           | --PWTQR-- | 386  | 0 | 421                 |
| -YITWG--   | 10 | 0 | 11                | --PHRYP-- | 173 | 0 | 178                           | --YPTWQ-- | 377  | 0 | 409                 |
| -RKMHT--   | 12 | 0 | 29 ACT_SITE: 0.41 | --AFMPW-- | 144 | 0 | 146                           | --RLSCA-- | 332  | 0 | 359                 |
| -WRVWD--   | 11 | 0 | 15                | ---FMPWN- | 105 | 0 | 105                           | --LRLSC-- | 492  | 0 | 554                 |
| -QGWDC--   | 10 | 0 | 13                | --FHHGG-- | 124 | 0 | 135                           | --AHYCR-- | 330  | 0 | 361                 |
| -VMKLY--   | 11 | 0 | 16                | --TFHGG-- | 122 | 0 | 130                           | --LAHYC-- | 331  | 0 | 339                 |
| -KVPWA--   | 13 | 0 | 15                | --PTDMQ-- | 152 | 0 | 166                           | --NMFTS-- | 382  | 0 | 453                 |
| -VCCQN--   | 11 | 0 | 13                | --FPDPW-- | 132 | 0 | 142                           | --TNMFT-- | 364  | 0 | 373                 |
| -KINSC--   | 10 | 0 | 21 DISULFID: 0.24 | --TETVW-- | 114 | 0 | 116                           | --VVYPW-- | 306  | 0 | 363                 |
|            |    |   |                   | --HLDYH-- | 119 | 0 | 121                           | --VYPWT-- | 403  | 0 | 463                 |
|            |    |   |                   | --CDKIT-- | 132 | 0 | 261 METAL: 0.48               | --VTHIC-- | 901  | 0 | 907                 |
|            |    |   |                   | --PCDWY-- | 111 | 0 | 114                           | --VAHIC-- | 392  | 0 | 400                 |
|            |    |   |                   | --YPAME-- | 151 | 0 | 155                           | --EWIMG-- | 1064 | 0 | 1072                |
|            |    |   |                   | --PQFYF-- | 129 | 0 | 135                           | --VEWIM-- | 1015 | 0 | 1021                |
|            |    |   |                   | --QRNWI-- | 116 | 0 | 117                           | --SECGK-- | 399  | 0 | 615 ZN_FING: 0.63   |
|            |    |   |                   | --QMHAN-- | 178 | 0 | 180                           | --EECGK-- | 430  | 0 | 564 ZN_FING: 0.73   |
|            |    |   |                   | --YHVDV-- | 239 | 0 | 238                           | --PYECK-- | 453  | 0 | 583 ZN_FING: 0.77   |
|            |    |   |                   | --FECLH-- | 129 | 0 | 136                           | --KPYEC-- | 1061 | 0 | 1400 ZN_FING: 0.75  |
|            |    |   |                   | --YVPGW-- | 109 | 0 | 113                           | --MFRPI-- | 323  | 0 | 326                 |
|            |    |   |                   | --AWYSY-- | 121 | 0 | 125                           | --MMFRP-- | 816  | 0 | 827                 |
|            |    |   |                   | --RFGVM-- | 110 | 0 | 114                           | --MHYTA-- | 331  | 0 | 343                 |
|            |    |   |                   | --LEPMM-- | 121 | 0 | 123                           | --MHYTS-- | 992  | 0 | 1001                |
|            |    |   |                   | --TRMKS-- | 124 | 0 | 141 REGION: 0.79              | --RINYL-- | 350  | 0 | 361                 |
|            |    |   |                   | --MGAQM-- | 224 | 0 | 233                           | --INWLD-- | 386  | 0 | 390                 |
|            |    |   |                   | --MNPMD-- | 210 | 0 | 213                           | --TQRFP-- | 317  | 0 | 351                 |
|            |    |   |                   | --DWMEQ-- | 263 | 0 | 267                           | --WTRRF-- | 316  | 0 | 347                 |
|            |    |   |                   | --YIRFA-- | 106 | 0 | 208 DOMAIN: 0.47              | --ISSMW-- | 683  | 0 | 686                 |
|            |    |   |                   | --DHRIN-- | 194 | 0 | 201                           | --NISSW-- | 653  | 0 | 660                 |
|            |    |   |                   | --TYNFP-- | 196 | 0 | 202                           | --RSMMP-- | 707  | 0 | 713                 |
|            |    |   |                   | --KCFRD-- | 118 | 0 | 125                           | --SMMFP-- | 732  | 0 | 743                 |
|            |    |   |                   | --VMPGN-- | 131 | 0 | 138                           | --VCRDN-- | 430  | 0 | 449                 |
|            |    |   |                   | --GEHAD-- | 105 | 0 | 201 BINDING: 0.42             | --PYITI-- | 1034 | 0 | 1043                |
|            |    |   |                   | --RCDAN-- | 107 | 0 | 107                           | --HYVRY-- | 471  | 0 | 478                 |
|            |    |   |                   | --PHYTR-- | 124 | 0 | 125                           | --WYFLP-- | 1593 | 0 | 1608                |
|            |    |   |                   | --VIKSH-- | 113 | 0 | 188 DOMAIN: 0.39              | --HQRLH-- | 826  | 0 | 1142 ZN_FING: 0.72  |
|            |    |   |                   | --HPWPF-- | 104 | 0 | 209 DOMAIN: 0.49              | --ELHCD-- | 331  | 0 | 694 METAL: 0.46     |
|            |    |   |                   | --VYKHA-- | 141 | 0 | 148                           | --THPLM-- | 381  | 0 | 393                 |
|            |    |   |                   | --RFTDG-- | 121 | 0 | 122                           | --MFETP-- | 307  | 0 | 339                 |
|            |    |   |                   | --AGAYW-- | 110 | 0 | 121                           | --YGSYM-- | 330  | 0 | 337                 |
|            |    |   |                   | --MMVGR-- | 136 | 0 | 273 DOMAIN: 0.48              | --ACEVW-- | 306  | 0 | 315                 |
|            |    |   |                   | --MNIQG-- | 185 | 0 | 189                           | --MYQQN-- | 305  | 0 | 311                 |
|            |    |   |                   | --QYAYR-- | 116 | 0 | 122                           | --TLTWI-- | 898  | 0 | 909                 |
|            |    |   |                   | --HGTYP-- | 155 | 0 | 158                           | --WIRYI-- | 351  | 0 | 356                 |
|            |    |   |                   | --FRCGF-- | 268 | 0 | 268                           | --HPFII-- | 386  | 0 | 397                 |
|            |    |   |                   | --SVMQF-- | 107 | 0 | 109                           | --TKTYF-- | 308  | 0 | 335                 |
|            |    |   |                   | --KDyec-- | 142 | 0 | 150                           | --ECKEC-- | 391  | 0 | 553 ZN_FING: 0.68   |
|            |    |   |                   | --ITHEM-- | 195 | 0 | 383 DOMAIN: 0.49              | --NPIIY-- | 433  | 0 | 890 TRANSMEM: 0.46  |
|            |    |   |                   | --WMSHG-- | 160 | 0 | 322 DOMAIN: 0.50              | --KIWFQ-- | 448  | 0 | 902 DNA_BIND: 0.49  |
|            |    |   |                   | --PYRKV-- | 156 | 0 | 159                           | --GHPIS-- | 398  | 0 | 414                 |
|            |    |   |                   | --PMFHQ-- | 126 | 0 | 134                           | --WDTAG-- | 503  | 0 | 1071 NP_BIND: 0.42  |
|            |    |   |                   | --SCSGM-- | 111 | 0 | 226 METAL: 0.48               | --QPPPG-- | 451  | 0 | 607 REGION: 0.45    |
|            |    |   |                   | --MLYPT-- | 104 | 0 | 111                           | --WIGGQ-- | 1265 | 0 | 1282                |
|            |    |   |                   | --TRHNA-- | 117 | 0 | 121                           | --RNLSH-- | 333  | 0 | 361                 |
|            |    |   |                   | --KDHS--  | 122 | 0 | 129                           | --KQBSM-- | 812  | 0 | 822                 |
|            |    |   |                   | --NSMNC-- | 124 | 0 | 128                           | --FCAEA-- | 379  | 0 | 389                 |

| Swiss-Prot |      |      |                |             |      |      |                |            |     |      |               |
|------------|------|------|----------------|-------------|------|------|----------------|------------|-----|------|---------------|
| URP        |      |      |                |             |      |      |                |            |     |      |               |
| A          |      |      |                | B           |      |      |                | E          |     |      |               |
| --SFWGA--  | 1539 | 1.00 | 1547           | --MHTA--    | 332  | 0.28 | 343            | --LPHRY--  | 142 | 0.01 | 149           |
| ---FWGAT-  | 1549 | 1.00 | 1561           | ---HYTAD-   | 377  | 0.04 | 383            | ---PHRYP-- | 174 | 0.06 | 178           |
| ---WGATV-  | 1609 | 0.97 | 1630           | ---HYTSD-   | 997  | 0.09 | 1012           | ---KSHHN-- | 241 | 0.02 | 479 DOMAIN:   |
| ---TWIGG-- | 1338 | 0.99 | 1361           | ---MHYTS--- | 993  | 0.51 | 1001           | ---KSHH--- | 235 | 0.03 | 472 DOMAIN:   |
| ---WIGGQ-- | 1267 | 1.00 | 1282           | ---YGWII--  | 347  | 0.13 | 352            | ---KDHHS-- | 122 | 0.04 | 129           |
| ---LTWIG-- | 1422 | 0.95 | 1448           | ---NYGWI--  | 394  | 0.41 | 400            | ---NIMMF-- | 178 | 0.02 | 184           |
| ---KIPFH-- | 1262 | 0.98 | 1286           | ---YGLWI--  | 763  | 0.06 | 771            | ---MEPCK-- | 172 | 0.30 | 184           |
| ---IPFPH-- | 1478 | 0.99 | 1493           | ---IRYMH--  | 486  | 0.58 | 976 METAL:     | ---MIEGP-- | 126 | 0    | 129           |
| ---DKIPF-- | 1279 | 0.60 | 1299           | ---RYMHA--  | 508  | 0.30 | 1022 METAL:    | ---MIGDP-- | 132 | 0.01 | 138           |
| ---LAMHY-- | 1549 | 1.00 | 1581           | ---YMHAN--  | 501  | 0.53 | 1008 METAL:    | ---RHHTF-- | 139 | 0.28 | 142           |
| ---AMHYT-- | 1484 | 1.00 | 1510           | ---PWTQR--  | 386  | 0.46 | 421            | ---HHHFE-- | 150 | 0.39 | 159           |
| ---FLAMH-- | 1427 | 1.00 | 1444           | ---YPTWQ--  | 377  | 0.85 | 409            | ---TMDNM-- | 205 | 0.84 | 207           |
| ---ICRDV-- | 1386 | 0.99 | 1411           | ---VYPWT--  | 403  | 0.61 | 463            | ---DWMMEQ  | 265 | 0.61 | 267           |
| ---CRDYN-- | 1358 | 1.00 | 1383           | ---VMHDY--  | 388  | 0.35 | 399            | ---WNMGW-- | 162 | 0.95 | 163           |
| ---HICRD-- | 1364 | 1.00 | 1379           | ---PIVMH--  | 388  | 0.15 | 396            | ---NMGWM-- | 162 | 0.80 | 163           |
| ---VLPWG-- | 1652 | 0.95 | 1679           | ---YCRDN--  | 430  | 0.77 | 449            | ---KWNMG-- | 170 | 0.51 | 171           |
| ---YVLPW-- | 1646 | 0.99 | 1667           | ---HYCRD--  | 372  | 0.89 | 386            | ---QWNGI-- | 139 | 0.23 | 145           |
| ---GVLPV-- | 1728 | 0.38 | 1782           | ---CRDYN--  | 1357 | 0.24 | 1383           | ---DQWNG-- | 168 | 0.30 | 177           |
| ---IPNKL-- | 1606 | 0.29 | 1634           | ---FFCLV--  | 1087 | 0.13 | 1103           | ---SDQWG-- | 144 | 0.07 | 155           |
| ---SIPNK-- | 1591 | 0.63 | 1606           | ---FCCLY--  | 452  | 0.27 | 461            | ---VAHIW-- | 127 | 0.27 | 134           |
| ---PNKLG-- | 1598 | 0.46 | 1609           | ---MFFIC--  | 1069 | 0.69 | 1071           | ---AHIWF-- | 132 | 0.43 | 140           |
| ---WNFGS-- | 1647 | 1.00 | 1668           | ---QCLFW--  | 548  | 0.97 | 549            | ---HIWFL-- | 129 | 0.13 | 135           |
| ---NFGSL-- | 1595 | 0.62 | 1626           | ---SQCLF--  | 554  | 0.28 | 563            | ---FLMHV-- | 169 | 0.02 | 173           |
| ---WNFGS-- | 1587 | 1.00 | 1600           | ---ICLFL--  | 377  | 0.01 | 392            | ---MHVIA-- | 172 | 0.04 | 177           |
| ---PPGPP-- | 1291 | 0.87 | 1195 REGION:   | ---CLFLH--  | 472  | 0.24 | 958 METAL:     | ---HFCSM-- | 142 | 0.60 | 118           |
| ---PGPPG-- | 1677 | 0.30 | 1065 REGION:   | ---AHYCR--  | 330  | 0.77 | 361            | ---FCSMC-- | 146 | 0.50 | 152           |
| ---GPPGP-- | 1855 | 0.30 | 1082 REGION:   | ---AHICR--  | 406  | 0.39 | 425            | ---PGCSM-- | 130 | 0.05 | 255 METAL:    |
| ---PPPPP-- | 5683 | 0.48 | 4058 COMPBIAS: | ---LAHYC--  | 331  | 0.46 | 339            | ---FCRCP-- | 269 | 0.11 | 268           |
| ---QMSFW-- | 1634 | 1.00 | 1642           | ---NYTFA--  | 793  | 0.01 | 808            | ---FGFRC-- | 245 | 0.11 | 249           |
| ---GMSF--  | 1649 | 1.00 | 1665           | ---PDMYT--  | 819  | 0.07 | 858            | ---IRMKI-- | 140 | 0.01 | 146           |
| ---MSFWG-- | 1538 | 1.00 | 1546           | ---QNRMR--  | 317  | 0.09 | 645 DNA_BIND:  | ---TRMKS-- | 125 | 0    | 141 REGION:   |
| ---LLFLH-- | 1373 | 0.65 | 1430           | ---WFQNR--  | 642  | 0.79 | 1305 DNA_BIND: | ---YAHAR-- | 146 | 0.01 | 152           |
| ---LFLHE-- | 1353 | 0.87 | 1372           | ---VTHIC--  | 901  | 0.60 | 907            | ---QYAHA-- | 146 | 0.06 | 151           |
| ---HLLFL-- | 1375 | 0.65 | 2730 METAL:    | ---VAHIC--  | 392  | 0.24 | 400            | ---YKHA--  | 141 | 0.02 | 148           |
| ---WGFSS-- | 1558 | 1.00 | 1588           | ---THICR--  | 922  | 0.62 | 931            | ---HMQQ--  | 273 | 0.39 | 544 DOMAIN:   |
| ---WQMS--  | 1654 | 1.00 | 1662           | ---HICRD--  | 1354 | 0.55 | 1379           | ---THMQ--  | 273 | 0.41 | 544 DOMAIN:   |
| ---PHIKP-- | 1343 | 0.99 | 1369           | ---PHFIL--  | 990  | 0.01 | 1989 METAL:    | ---ANMQR-- | 144 | 0.04 | 150           |
| ---PPHIK-- | 1342 | 0.99 | 1363           | ---AFPHI--  | 980  | 0.02 | 1973 METAL:    | ---GANMQ-- | 145 | 0.04 | 148           |
| ---TPPHI-- | 1361 | 1.00 | 1377           | ---FAPFH--  | 1257 | 0.15 | 2525 METAL:    | ---FECLH-- | 129 | 0.07 | 136           |
| ---FFAFH-- | 1262 | 1.00 | 2530 METAL:    | ---EWFHW--  | 1064 | 0.60 | 1072           | ---YFECL-- | 139 | 0.04 | 144           |
| ---FAFHF-- | 1258 | 1.00 | 2525 METAL:    | ---VEWV--   | 1015 | 0.69 | 1021           | ---AYFEC-- | 151 | 0.11 | 154           |
| ---RFFAF-- | 1266 | 0.96 | 1275           | ---WVGW--   | 1318 | 0.41 | 1334           | ---GWMHD-- | 123 | 0.83 | 124           |
| ---LTRFF-- | 1584 | 0.88 | 1605           | ---PYEKC--  | 453  | 0.60 | 583 ZN_FING:   | ---GSYHD-- | 200 | 0.02 | 203           |
| ---TRFFA-- | 1483 | 0.96 | 1499           | ---KPYEC--  | 1051 | 0.60 | 1400 ZN_FING:  | ---MMSHG-- | 161 | 0.55 | 322 DOMAIN:   |
| ---TLTRF-- | 1660 | 0.68 | 1688           | ---KPYKC--  | 996  | 0.61 | 1361 ZN_FING:  | ---VWMSH-- | 183 | 0.63 | 362 DOMAIN:   |
| ---LFAFY-- | 1540 | 0.57 | 1574           | ---PYKCE--  | 346  | 0.60 | 459 ZN_FING:   | ---PTYNF-- | 149 | 0.04 | 153           |
| ---FLFAY-- | 1609 | 0.81 | 1639           | ---AYVAY--  | 348  | 0    | 365            | ---TYNFP-- | 196 | 0.04 | 202           |
| ---YLFYA-- | 1625 | 0.81 | 1653           | ---YVAYP--  | 432  | 0.02 | 456            | ---AMLCY-- | 145 | 0.14 | 149           |
| ---VDKAT-- | 1281 | 0.19 | 1307           | ---HYVRY--  | 471  | 0.33 | 478            | ---MLCYV-- | 156 | 0.13 | 159           |
| ---DKATL-- | 1309 | 0.26 | 1340           | ---SAMWN--  | 530  | 0.83 | 538            | ---GYDHI-- | 218 | 0.06 | 220           |
| ---KATLT-- | 1304 | 0.31 | 1392           | ---ISAMW--  | 524  | 0.51 | 531            | ---PGYDH-- | 162 | 0.09 | 166           |
| ---LGDPD-- | 1370 | 0.24 | 1419           | ---AMWNF--  | 533  | 0.91 | 540            | ---LYPAM-- | 160 | 0    | 172           |
| ---LLGDP-- | 1327 | 0.15 | 1567           | ---RLSCA--  | 332  | 0    | 359            | ---YPAME-- | 152 | 0.03 | 155           |
| ---AILRS-- | 1641 | 0.17 | 1701           | ---LRLSC--  | 492  | 0    | 554            | ---HIDHG-- | 350 | 0.18 | 703 NP_BIND:  |
| ---YAILR-- | 1580 | 0.29 | 1606           | ---NMFTS--  | 382  | 0.11 | 453            | ---AHIDH-- | 337 | 0.10 | 671 NP_BIND:  |
| ---PPHPY-- | 1513 | 1.00 | 1524           | ---TNMFT--  | 364  | 0.13 | 373            | ---IDWQG-- | 153 | 0.26 | 297 DOMAIN:   |
| ---FHPYY-- | 1266 | 1.00 | 1281           | ---GWIRI--  | 357  | 0.05 | 363            | ---DWQGA-- | 137 | 0.09 | 268 DOMAIN:   |
| ---KPEWY-- | 1571 | 1.00 | 1578           | ---WIRY--   | 351  | 0.34 | 356            | ---FENFR-- | 182 | 0.01 | 184           |
| ---PEWYF-- | 1698 | 1.00 | 1714           | ---KCEEC--  | 356  | 0.70 | 454 ZN_FING:   | ---ENRPM-- | 143 | 0.06 | 145           |
| ---ETGSN-- | 1399 | 0.50 | 1417           | ---YKCEP--  | 317  | 0.29 | 400 ZN_FING:   | ---PTMQ--  | 152 | 0.05 | 166           |
| ---HETGS-- | 1395 | 0.90 | 1411           | ---HPLMK--  | 533  | 0.15 | 544            | ---PPDPW-- | 132 | 0.16 | 142           |
| ---SDSDS-- | 1979 | 0.46 | 707 COMPBIAS:  | ---THPLM--  | 381  | 0.11 | 393            | ---CDKIT-- | 133 | 0.09 | 261 METAL:    |
| ---SDSDS-- | 2111 | 0.66 | 749 COMPBIAS:  | ---ETWNI--  | 1151 | 0.25 | 1165           | ---CGRYE-- | 124 | 0.06 | 255 BINDING:  |
| ---LRSIP-- | 1672 | 0.45 | 1703           | ---KETWN--  | 410  | 0.30 | 416            | ---HRFAL-- | 197 | 0.03 | 199           |
| ---RSIPN-- | 1610 | 0.87 | 1630           | ---LBTWN--  | 320  | 0.14 | 329            | ---QMIFQ-- | 230 | 0.06 | 456 DOMAIN:   |
| ---IWGGF-- | 1329 | 1.00 | 1351           | ---SECGK--  | 399  | 0.09 | 615 ZN_FING:   | ---ARDTK-- | 170 | 0    | 177           |
| ---WIWGG-- | 1320 | 1.00 | 1334           | ---SECGK--  | 431  | 0.04 | 564 ZN_FING:   | ---PQFYF-- | 129 | 0.07 | 135           |
| ---SAIPY-- | 1427 | 0.74 | 1463           | ---ISSWW--  | 683  | 0.67 | 686            | ---IPAMY-- | 139 | 0.20 | 142           |
| ---LSAIP-- | 1382 | 0.29 | 1465           | ---NISSW--  | 653  | 0.28 | 660            | ---IPCLD-- | 173 | 0    | 350 ACT_SITE: |
| ---FLHET-- | 1389 | 0.97 | 1411           | ---RGPPG--  | 417  | 0    | 514 REGION:    | ---QMHN--  | 178 | 0.32 | 180           |
| ---LHETG-- | 1404 | 0.72 | 1431           | ---QGPPG--  | 451  | 0    | 607 REGION:    | ---YHDVY-- | 235 | 0.05 | 238           |
| ---GASMF-- | 1301 | 0.85 | 1325           | ---MFRPI--  | 323  | 0.07 | 326            | ---YQTVY-- | 130 | 0.05 | 132           |
| ---ASMPF-- | 1273 | 1.00 | 1293           | ---MMFRP--  | 816  | 0.47 | 827            | ---TDVWY-- | 131 | 0.05 | 138           |
| ---CGKAF-- | 2034 | 1.00 | 2546 ZN_FING:  | ---SSWNV--  | 757  | 0.97 | 758            | ---IAMGH-- | 156 | 0.05 | 159           |
| ---ECGKA-- | 1346 | 0.79 | 1740 ZN_FING:  | ---SWWNF--  | 764  | 1.00 | 769            | ---RDVHP-- | 147 | 0    | 155           |
| ---MYFLF-- | 1595 | 1.00 | 1608           | ---RIWYL--  | 350  | 0.19 | 361            | ---MGAQM-- | 234 | 0.08 | 233           |
| ---EWYFL-- | 1620 | 1.00 | 1630           | ---IWYLD--  | 386  | 0.21 | 390            | ---MNPMD-- | 219 | 0.35 | 213           |
| ---IKPEW-- | 1584 | 0.97 | 1593           | ---RSMMP--  | 707  | 0.31 | 713            | ---MNIGQ-- | 185 | 0.06 | 189           |
| ---HIKPE-- | 1580 | 0.82 | 1599           | ---SMMFR--  | 732  | 0.31 | 743            | ---DHRIN-- | 195 | 0.06 | 201           |
| ---GSNNP-- | 1567 | 0.97 | 1584           | ---WNFGS--  | 1646 | 0.37 | 1668           | ---FHIGG-- | 124 | 0    | 135           |
| ---TGSNN-- | 1408 | 0.89 | 1438           | ---PYTTL--  | 1035 | 0.14 | 1043           | ---AFMPW-- | 144 | 0.47 | 146           |
| ---AYAIL-- | 1527 | 0.16 | 1542           | ---DDMEK--  | 321  | 0    | 354            | ---VMPFN-- | 131 | 0.02 | 138           |
| ---FAYAI-- | 1541 | 0.68 | 1562           | ---WYFLF--  | 1593 | 0.42 | 1608           | ---IWTTF-- | 175 | 0.01 | 187           |
| ---LDPWQ-- | 1655 | 1.00 | 1671           | ---RGIYY--  | 433  | 0.01 | 447            | ---YAEVG-- | 270 | 0    | 270           |
| ---PWGQM-- | 1660 | 1.00 | 1676           | ---HQRH--   | 826  | 0.38 | 1142 ZN_FING:  | ---PYQHG-- | 131 | 0.09 | 139 REGION:   |
| ---VNYGW-- | 1334 | 1.00 | 1344           | ---ELHCD--  | 331  | 0.29 | 694 METAL:     | ---ATIEW-- | 132 | 0.05 | 136           |
| ---DVNYG-- | 1351 | 0.76 | 1361           | ---YGSYM--  | 331  | 0.20 | 337            | ---PHYTR-- | 124 | 0.09 | 125           |
| ---YYSY--  | 1600 | 1.00 | 1648           | ---TLTWI--  | 898  | 0.03 | 909            | ---ESHNH-- | 149 | 0.04 | 157           |
| ---HANGA-- | 1613 | 0.94 | 3225 METAL:    | ---HFFIL--  | 387  | 0.08 | 397            | ---VMPQT-- | 223 | 0.03 | 410 REGION:   |
| ---QILTG-- | 1258 | 0.70 | 1359           | ---ECKEC--  | 391  | 0.70 | 553 ZN_FING:   | ---MMVGR-- | 136 | 0.11 | 273 DOMAIN:   |
| ---QQQQQ-- | 9113 | 0.53 | 3250 COMPBIAS: | ---NPIIY--  | 433  | 0    | 890 TRANSMEM:  | ---IENYS-- | 173 | 0    | 341 DOMAIN:   |
| ---TNLLS-- | 1485 | 0.53 | 1561           | ---KIMFO--  | 448  | 0.53 | 902 DNA_BIND:  | ---YFYPD-- | 223 | 0.08 | 229           |
| ---SRSRS-- | 1421 | 0.39 | 1064 COMPBIAS: | ---GHPIS--  | 398  | 0.01 | 414            | ---HGTYP-- | 155 | 0.03 | 158           |
| ---GGQPV-- | 1359 | 0.69 | 1403           | ---WDTAG--  | 503  | 0.03 | 1071 NP_BIND:  | ---KDYEC-- | 142 | 0.07 | 150           |
| ---AFSSV-- | 1424 | 0.49 | 1477           | ---WGGFS--  | 1556 | 0.06 | 1588           | ---ITHEM-- | 195 | 0.09 | 383 DOMAIN:   |
| ---PSNIS-- | 1331 | 0.83 | 1375           | ---WIGQQ--  | 1265 | 0.13 | 1282           | ---PYRKY-- | 158 | 0    | 159           |
| ---TVITN-- | 1794 | 0.66 | 1835           | ---RNLSH--  | 333  | 0.02 | 361            | ---PMFHQ-- | 126 | 0.45 | 134           |
| ---NNNNN-- | 2219 | 0.93 | 943 COMPBIAS:  | ---TRFRF--  | 317  | 0.06 | 351            | ---RYYQI-- | 125 | 0.06 | 131           |
| ---MATAF-- | 1624 | 0.93 | 1642           | ---KQRSM--  | 812  | 0.04 | 822            | ---NSMNC-- | 124 | 0.26 | 128           |
| ---IPYIG-- | 1318 | 0.57 | 1353           | ---FCAEA--  | 379  | 0.04 | 389            | ---GPMTI-- | 183 | 0.01 | 184           |
