# Supplementary material for: Characterization of oligopeptide patterns in large protein sets
Source: PubMed Central journal article supplement (PMC2231379; doi:10.1186/1471-2164-8-346), 2007-10-01
Supplement: 1471-2164-8-346-S4.pdf [file 1471-2164-8-346-S4.pdf]

| Genome      |                                |                | POP         |                           |                             | E              |                           |                            |                |
|-------------|--------------------------------|----------------|-------------|---------------------------|-----------------------------|----------------|---------------------------|----------------------------|----------------|
| A           | B                              |                |             |                           |                             |                |                           |                            |                |
| --RFRP-- 43 | 20 A17 B167 E129               |                | --CTRG-- 97 | 50 A18 B171 E135 EM_FING: | 0.30                        | --PCRN-- 53    | 9 A10 B14 E121            | REPEAT:                    | 0.33           |
| --RFRP-- 43 | 16 A17 B166 E123 DISULFID:     | 0.44           | --CTRG-- 97 | 20 A18 B174 E135 METAL:   | 0.40                        | --RQRM-- 48    | 6 A10 B13 E124            | REPEAT:                    | 0.33           |
| --RFRP-- 43 | 2928 A130 B1288 E150 ACT_SITE: | 0.42 DOMAIN:   | 0.26        | --CTRG-- 97               | 28 A11 B184 E129 METAL:     | 0.19           | --RQRM-- 48               | 8 A10 B14 E115 DOMAIN:     | 0.38           |
| --RFRP-- 43 | 1187 A129 B1284 E150 ACT_SITE: | 0.33 DOMAIN:   | 0.32        | --CTRG-- 97               | 22 A16 B178 E124 METAL:     | 0.44           | --RQRM-- 48               | 9 A10 B12 E117 DOMAIN:     | 0.44           |
| --RFRP-- 43 | 1284 A130 B1290 E145 DOMAIN:   | 0.47           | --CTRG-- 97 | 5 A13 B183 E11            |                             | --RQRM-- 48    | 11 A10 B12 E122 TRANSMEM: | 0.36 TOPO_DOM:             | 0.27           |
| --RFRP-- 43 | 287 A124 B1240 E143 DOMAIN:    | 0.41           | --CTRG-- 97 | 15 A10 B187 E11           | TRANSMEM:                   | 0.27           | --RQRM-- 48               | 15 A10 B19 E118            |                |
| --RFRP-- 43 | 14 A14 B152 E129 CARBOHYD:     | 0.21 TOPO_DOM: | 0.21        | --CTRG-- 97               | 2 A10 B15 E11               |                | --RQRM-- 48               | 6 A10 B13 E116 DOMAIN:     | 0.33           |
| --RFRP-- 43 | 25 A14 B148 E139               |                |             | --CTRG-- 97               | 5 A10 B127 E12              |                | --RQRM-- 48               | 25 A10 B11 E120 TOPO_DOM:  | 0.44           |
| --RFRP-- 43 | 65 A110 B189 E140              |                |             | --CTRG-- 97               | 10 A15 B166 E131 EM_FING:   | 0.27           | --RQRM-- 48               | 108 A10 B10 E129           |                |
| --RFRP-- 43 | 59 A124 B148 E135              |                |             | --CTRG-- 97               | 170 A13 B1134 E134 METAL:   | 0.37           | --RQRM-- 48               | 12 A10 B16 E120 TOPO_DOM:  |                |
| --RFRP-- 43 | 94 A122 B158 E137              |                |             | --CTRG-- 97               | 71 A18 B165 E147 EM_FING:   | 0.21           | --RQRM-- 48               | 8 A10 B13 E119 EM_FING:    | 0.33           |
| --RFRP-- 43 | 252 A123 B1144 E143 DISULFID:  | 0.38           |             | --CTRG-- 97               | 10 A18 B1118 E114 METAL:    | 0.40           | --RQRM-- 48               | 13 A10 B10 E120 EM_FING:   | 0.31           |
| --RFRP-- 43 | 125 A126 B1106 E133 METAL:     | 0.22           |             | --CTRG-- 97               | 155 A118 B185 E140 EM_FING: | 0.23           | --RQRM-- 48               | 49 A10 B11 E117 TRANSMEM:  | 0.49           |
| --RFRP-- 43 | 75 A117 B169 E140 EM_FING:     | 0.28 METAL:    | 0.21        | --CTRG-- 97               | 58 A15 B167 E122 METAL:     | 0.28           | --RQRM-- 48               | 7 A10 B10 E123             |                |
| --RFRP-- 43 | 80 A127 B146 E138              |                |             | --CTRG-- 97               | 34 A13 B175 E132 EM_FING:   | 0.24           | --RQRM-- 48               | 8 A10 B10 E122 DOMAIN:     | 0.25           |
| --RFRP-- 43 | 84 A117 B1233 E149             |                |             | --CTRG-- 97               | 75 A13 B173 E122 METAL:     | 0.48           | --RQRM-- 48               | 4 A10 B10 E118 TOPO_DOM:   | 0.25           |
| --RFRP-- 43 | 155 A126 B1200 E147 METAL:     | 0.42           |             | --CTRG-- 97               | 59 A17 B179 E140 METAL:     | 0.24           | --RQRM-- 48               | 12 A10 B10 E122 REPEAT:    | 0.42           |
| --RFRP-- 43 | 121 A125 B1116 E128 METAL:     | 0.44           |             | --CTRG-- 97               | 63 A17 B181 E129 EM_FING:   | 0.29 METAL:    | 0.25                      | 12 A10 B10 E128 REPEAT:    | 0.42           |
| --RFRP-- 43 | 239 A123 B1252 E145 DOMAIN:    | 0.39           |             | --CTRG-- 97               | 58 A18 B1102 E132 DISULFID: | 0.28           | --RQRM-- 48               | 1 A10 B10 E13              |                |
| --RFRP-- 43 | 543 A128 B1263 E143 DOMAIN:    | 0.46           |             | --CTRG-- 97               | 24 A11 B161 E134 EM_FING:   | 0.18           | --RQRM-- 48               | 16 A10 B15 E119 TOPO_DOM:  | 0.44           |
| --RFRP-- 43 | 643 A123 B1266 E146 DOMAIN:    | 0.45           |             | --CTRG-- 97               | 95 A16 B188 E140 EM_FING:   | 0.28           | --RQRM-- 48               | 10 A10 B11 E13 TRANSMEM:   | 0.30 TOPO_DOM: |
| --RFRP-- 43 | 1254 A130 B1289 E145 DOMAIN:   | 0.48           |             | --CTRG-- 97               | 83 A13 B162 E135 EM_FING:   | 0.24           | --RQRM-- 48               | 9 A10 B13 E122 CARBOHYD:   | 0.33           |
| --RFRP-- 43 | 1406 A127 B1280 E150 HP_BIND:  | 0.32 DOMAIN:   | 0.31        | --CTRG-- 97               | 75 A14 B186 E126            |                | --RQRM-- 48               | 16 A10 B10 E119 EM_FING:   | 0.44           |
| --RFRP-- 43 | 563 A125 B1283 E150 HP_BIND:   | 0.35 DOMAIN:   | 0.25        | --CTRG-- 97               | 17 A11 B162 E121            |                | --RQRM-- 48               | 6 A11 B11 E121             |                |
| --RFRP-- 43 | 16 A17 B166 E123 DISULFID:     | 0.37           |             | --CTRG-- 97               | 10 A15 B187 E120 METAL:     | 0.43           | --RQRM-- 48               | 1 A10 B10 E13              |                |
| --RFRP-- 43 | 81 A120 B176 E138 CARBOHYD:    | 0.21           |             | --CTRG-- 97               | 3 A10 B122 E113             |                | --RQRM-- 48               | 5 A10 B14 E121 TOPO_DOM:   | 0.44           |
| --RFRP-- 43 | 31 A128 B1182 E140 TOPO_DOM:   | 0.23           |             | --CTRG-- 97               | 16 A10 B196 E16 STRAND:     | 0.25           | --RQRM-- 48               | 33 A10 B14 E114            |                |
| --RFRP-- 43 | 14 A14 B115 E123               |                |             | --CTRG-- 97               | 54 A121 B199 E116           |                | --RQRM-- 48               | 21 A10 B16 E113 DOMAIN:    | 0.24           |
| --RFRP-- 43 | 6 A15 B118 E129                |                |             | --CTRG-- 97               | 280 A16 B1111 E137 METAL:   | 0.45 EM_FING:  | 0.24 REPEAT:              | 5 A10 B15 E127             |                |
| --RFRP-- 43 | 185 A125 B1180 E131 DOMAIN:    | 0.45           |             | --CTRG-- 97               | 99 A12 B166 E138 METAL:     | 0.28           | --RQRM-- 48               | 8 A10 B14 E117 BINDING:    | 0.25 TOPO_DOM: |
| --RFRP-- 43 | 133 A121 B1152 E138 METAL:     | 0.36           |             | --CTRG-- 97               | 137 A10 B175 E133 METAL:    | 0.12 EM_FING:  | 0.26                      | 38 A10 B11 E124 TRANSMEM:  | 0.38           |
| --RFRP-- 43 | 278 A129 B1178 E145 METAL:     | 0.27           |             | --CTRG-- 97               | 89 A11 B181 E135 EM_FING:   | 0.34 DOMAIN:   | 0.26                      | 94 A10 B12 E121 DOMAIN:    | 0.46           |
| --RFRP-- 43 | 175 A129 B193 E147 METAL:      | 0.48 EM_FING:  | 0.30        | --CTRG-- 97               | 89 A11 B181 E121 METAL:     | 0.35           | --RQRM-- 48               | 18 A10 B12 E120 TRANSMEM:  | 0.44           |
| --RFRP-- 43 | 70 A19 B189 E142 EM_FING:      | 0.26           |             | --CTRG-- 97               | 19 A12 B151 E125            |                | --RQRM-- 48               | 24 A10 B10 E116 TOPO_DOM:  | 0.21 DISULFID: |
| --RFRP-- 43 | 427 A127 B1224 E145 HP_BIND:   | 0.33           |             | --CTRG-- 97               | 42 A13 B181 E118 BINDING:   | 0.33 METAL:    | 0.31                      | 12 A10 B10 E114            |                |
| --RFRP-- 43 | 128 A128 B1195 E142            |                |             | --CTRG-- 97               | 13 A10 B154 E127 BINDING:   | 0.31           | 43                        | 43 A10 B12 E125            |                |
| --RFRP-- 43 | 153 A130 B1177 E141            |                |             | --CTRG-- 97               | 52 A14 B162 E130 METAL:     | 0.31           | --RQRM-- 48               | 27 A10 B13 E118 DISULFID:  | 0.24           |
| --RFRP-- 43 | 196 A125 B1210 E148            |                |             | --CTRG-- 97               | 16 A12 B153 E18 BINDING:    | 0.25           | --RQRM-- 48               | 9 A10 B14 E119 DOMAIN:     | 0.44           |
| --RFRP-- 43 | 186 A130 B1166 E145            |                |             | --CTRG-- 97               | 69 A13 B154 E112 METAL:     | 0.33           | --RQRM-- 48               | 19 A10 B13 E124 TOPO_DOM:  | 0.47           |
| --RFRP-- 43 | 188 A125 B1153 E147 EM_FING:   | 0.24 METAL:    | 0.22        | --CTRG-- 97               | 17 A12 B150 E122 BINDING:   | 0.24 METAL:    | 0.24                      | 2 A10 B16 E127 DOMAIN:     | 0.35           |
| --RFRP-- 43 | 115 A123 B1164 E135 METAL:     | 0.31           |             | --CTRG-- 97               | 155 A11 B151 E125 METAL:    | 0.43           | 0.21                      | 6 A10 B18 E127             |                |
| --RFRP-- 43 | 227 A122 B1171 E141 EM_FING:   | 0.26           |             | --CTRG-- 97               | 30 A14 B155 E130            |                | --RQRM-- 48               | 3 A10 B10 E114 DOMAIN:     | 0.33           |
| --RFRP-- 43 | 317 A130 B1217 E148            |                |             | --CTRG-- 97               | 105 A10 B186 E122 METAL:    | 0.38           | --RQRM-- 48               | 4 A10 B14 E115 DOMAIN:     | 0.25           |
| --RFRP-- 43 | 158 A123 B1177 E140            |                |             | --CTRG-- 97               | 367 A15 B1258 E142 EM_FING: | 0.48           | --RQRM-- 48               | 42 A10 B11 E126 DOMAIN:    | 0.48           |
| --RFRP-- 43 | 78 A119 B199 E145 METAL:       | 0.28           |             | --CTRG-- 97               | 147 A10 B147 E123 EM_FING:  | 0.44           | --RQRM-- 48               | 16 A10 B11 E120 TOPO_DOM:  | 0.48           |
| --RFRP-- 43 | 76 A125 B1145 E134 METAL:      | 0.47           |             | --CTRG-- 97               | 4 A15 B177 E19 METAL:       | 0.46           | --RQRM-- 48               | 25 A10 B16 E118 TRANSMEM:  | 0.48           |
| --RFRP-- 43 | 75 A123 B1167 E134 METAL:      | 0.45           |             | --CTRG-- 97               | 57 A12 B174 E18 DISULFID:   | 0.47           | --RQRM-- 48               | 3 A10 B14 E116             |                |
| --RFRP-- 43 | 63 A126 B1159 E148 METAL:      | 0.44           |             | --CTRG-- 97               | 15 A12 B168 E126 METAL:     | 0.40           | --RQRM-- 48               | 2 A10 B10 E127 EM_FING:    | 0.48           |
| --RFRP-- 43 | 65 A121 B184 E132              |                |             | --CTRG-- 97               | 5 A18 B115 E120             |                | --RQRM-- 48               | 57 A10 B10 E120 REGION:    | 0.28 DISULFID: |
| --RFRP-- 43 | 233 A122 B1137 E138 METAL:     | 0.38           |             | --CTRG-- 97               | 85 A18 B1129 E15 ACT_SITE:  | 0.49           | --RQRM-- 48               | 7 A10 B16 E124             |                |
| --RFRP-- 43 | 403 A117 B1245 E149            |                |             | --CTRG-- 97               | 54 A10 B191 E15             |                | --RQRM-- 48               | 3 A10 B11 E119 DISULFID:   | 0.33 TOPO_DOM: |
| --RFRP-- 43 | 54 A131 B121 E144              |                |             | --CTRG-- 97               | 67 A10 B192 E110            |                | --RQRM-- 48               | 5 A10 B19 E118             |                |
| --RFRP-- 43 | 115 A123 B1164 E135 METAL:     | 0.31           |             | --CTRG-- 97               | 57 A12 B174 E18 DISULFID:   | 0.47           | --RQRM-- 48               | 10 A10 B11 E124            |                |
| --RFRP-- 43 | 135 A127 B197 E140 EM_FING:    | 0.22           |             | --CTRG-- 97               | 19 A119 B158 E126 METAL:    | 0.32           | --RQRM-- 48               | 5 A10 B10 E122             |                |
| --RFRP-- 43 | 369 A131 B1216 E146            |                |             | --CTRG-- 97               | 3 A11 B16 E121              |                | --RQRM-- 48               | 0 A11 B10 E13              |                |
| --RFRP-- 43 | 89 A119 B189 E141              |                |             | --CTRG-- 97               | 83 A11 B153 E122            |                | --RQRM-- 48               | 12 A10 B16 E118 TOPO_DOM:  | 0.25           |
| --RFRP-- 43 | 211 A122 B1179 E142 METAL:     | 0.46           |             | --CTRG-- 97               | 39 A10 B185 E110 EM_FING:   | 0.49           | --RQRM-- 48               | 4 A10 B11 E122 DOMAIN:     | 0.25           |
| --RFRP-- 43 | 64 A120 B144 E137 METAL:       | 0.31           |             | --CTRG-- 97               | 58 A10 B194 E118 EM_FING:   | 0.49           | --RQRM-- 48               | 8 A10 B16 E116             |                |
| --RFRP-- 43 | 160 A123 B157 E143 EM_FING:    | 0.26           |             | --CTRG-- 97               | 123 A12 B162 E137 METAL:    | 0.40           | --RQRM-- 48               | 37 A11 B12 E146 TRANSMEM:  | 0.24 TOPO_DOM: |
| --RFRP-- 43 | 95 A124 B147 E144 EM_FING:     | 0.28           |             | --CTRG-- 97               | 13 A11 B196 E114 METAL:     | 0.46           | --RQRM-- 48               | 8 A10 B10 E117 DOMAIN:     | 0.25           |
| --RFRP-- 43 | 133 A122 B161 E145 EM_FING:    | 0.35           |             | --CTRG-- 97               | 49 A10 B198 E139            |                | --RQRM-- 48               | 21 A10 B19 E128 METAL:     | 0.31           |
| --RFRP-- 43 | 170 A125 B182 E146 EM_FING:    | 0.24           |             | --CTRG-- 97               | 20 A10 B189 E14 REGION:     | 0.40           | --RQRM-- 48               | 4 A10 B12 E119             |                |
| --RFRP-- 43 | 103 A131 B121 E144             |                |             | --CTRG-- 97               | 84 A10 B184 E11             |                | --RQRM-- 48               | 0 A10 B11 E11              |                |
| --RFRP-- 43 | 115 A123 B1164 E135 METAL:     | 0.31           |             | --CTRG-- 97               | 33 A12 B190 E132 DISULFID:  | 0.33 DOMAIN:   | 0.27                      | 16 A10 B11 E118 DOMAIN:    | 0.44 TOPO_DOM: |
| --RFRP-- 43 | 135 A127 B197 E140 EM_FING:    | 0.22           |             | --CTRG-- 97               | 684 A12 B1275 E149 DOMAIN:  | 0.23 DISULFID: | 0.23 ACT_SITE:            | 0.21 SITE:                 | 0.21           |
| --RFRP-- 43 | 369 A131 B1216 E146            |                |             | --CTRG-- 97               | 10 A11 B166 E17             |                | --RQRM-- 48               | 0 A10 B10 E11              |                |
| --RFRP-- 43 | 89 A119 B189 E141              |                |             | --CTRG-- 97               | 11 A11 B174 E111            |                | --RQRM-- 48               | 14 A10 B12 E129            |                |
| --RFRP-- 43 | 211 A122 B1179 E142 METAL:     | 0.46           |             | --CTRG-- 97               | 11 A11 B174 E111            |                | --RQRM-- 48               | 31 A10 B14 E123 DOMAIN:    | 0.42           |
| --RFRP-- 43 | 64 A120 B144 E137 METAL:       | 0.31           |             | --CTRG-- 97               | 74 A10 B191 E18             |                | --RQRM-- 48               | 5 A10 B19 E118             |                |
| --RFRP-- 43 | 160 A123 B157 E143 EM_FING:    | 0.26           |             | --CTRG-- 97               | 104 A18 B1243 E17           |                | --RQRM-- 48               | 0 A10 B14 E116             |                |
| --RFRP-- 43 | 95 A124 B147 E144 EM_FING:     | 0.28           |             | --CTRG-- 97               | 104 A18 B1145 E15           |                | --RQRM-- 48               | 0 A10 B16 E117             |                |
| --RFRP-- 43 | 133 A122 B161 E145 EM_FING:    | 0.35           |             | --CTRG-- 97               | 229 A11 B128 E16 METAL:     | 0.46           | --RQRM-- 48               | 7 A10 B10 E118 TOPO_DOM:   | 0.43 VAR_SEQ:  |
| --RFRP-- 43 | 170 A125 B182 E146 EM_FING:    | 0.24           |             | --CTRG-- 97               | 229 A11 B130 E18 METAL:     | 0.46           | --RQRM-- 48               | 7 A10 B10 E116 TOPO_DOM:   | 0.43 VAR_SEQ:  |
| --RFRP-- 43 | 103 A131 B121 E144             |                |             | --CTRG-- 97               | 693 A12 B1273 E147 REGION:  | 0.14 ACT_SITE: | 0.33                      | 27 A10 B12 E121            |                |
| --RFRP-- 43 | 115 A123 B1164 E135 METAL:     | 0.31           |             | --CTRG-- 97               | 18 A12 B111 E114 METAL:     | 0.22           | --RQRM-- 48               | 5 A14 B119 E19             |                |
| --RFRP-- 43 | 135 A127 B197 E140 EM_FING:    | 0.22           |             | --CTRG-- 97               | 10 A12 B110 E110 EM_FING:   | 0.43           | --RQRM-- 48               | 19 A10 B12 E117            |                |
| --RFRP-- 43 | 369 A131 B1216 E146            |                |             | --CTRG-- 97               | 114 A10 B118 E12            |                | --RQRM-- 48               | 19 A11 B10 E118            |                |
| --RFRP-- 43 | 89 A119 B189 E141              |                |             | --CTRG-- 97               | 15 A15 B195 E11             |                | --RQRM-- 48               | 23 A10 B17 E110 REGION:    | 0.43           |
| --RFRP-- 43 | 211 A122 B1179 E142 METAL:     | 0.46           |             | --CTRG-- 97               | 47 A10 B191 E130            |                | --RQRM-- 48               | 115 A10 B16 E123 TRANSMEM: | 0.44           |
| --RFRP-- 43 | 64 A120 B144 E137 METAL:       | 0.31           |             | --CTRG-- 97               | 2 A10 B15 E15               |                | --RQRM-- 48               | 8 A10 B14 E126 TOPO_DOM:   | 0.25           |
| --RFRP-- 43 | 160 A123 B157 E143 EM_FING:    | 0.26           |             | --CTRG-- 97               | 30 A12 B176 E122 TOPO_DOM:  | 0.23           | --RQRM-- 48               | 29 A10 B13 E127 DISULFID:  | 0.43 DOMAIN:   |
| --RFRP-- 43 | 95 A124 B147 E144 EM_FING:     | 0.28           |             | --CTRG-- 97               | 49 A11 B110 E142 METAL:     | 0.37           | --RQRM-- 48               | 14 A10 B10 E110 DOMAIN:    | 0.25           |
| --RFRP-- 43 | 133 A122 B161 E145 EM_FING:    | 0.35           |             | --CTRG-- 97               | 21 A10 B170 E116 VAR_SEQ:   | 0.29           | --RQRM-- 48               | 12 A12 B11 E119            |                |
| --RFRP-- 43 | 170 A125 B182 E146 EM_FING:    | 0.24           |             | --CTRG-- 97               | 14 A10 B181 E127            |                | --RQRM-- 48               | 25 A11 B12 E120 REPEAT:    | 0.32           |
| --RFRP-- 43 | 103 A131 B121 E144             |                |             | --CTRG-- 97               | 5 A11 B161 E126             |                | --RQRM-- 48               | 42 A11 B17 E127 METAL:     | 0.43           |
| --RFRP-- 43 | 115 A123 B1164 E135 METAL:     | 0.31           |             | --CTRG-- 97               | 11 A15 B120 E116            |                | --RQRM-- 48               | 8 A10 B10 E131 EM_FING:    | 0.38           |
| --RFRP-- 43 | 135 A127 B197 E140 EM_FING:    | 0.22           |             | --CTRG-- 97               | 36 A10 B1131 E16 DISULFID:  | 0.31 DOMAIN:   | 0.22                      | 35 A10 B10 E123 REPEAT:    | 0.45           |
| --RFRP-- 43 | 369 A131 B1216 E146            |                |             | --CTRG-- 97               | 9 A11 B190 E111 METAL:      | 0.22           | --RQRM-- 48               | 7 A10 B18 E127             |                |
| --RFRP-- 43 | 89 A119 B189 E                 |                |             |                           |                             |                |                           |                            |                |

| Genome   |    |                         |          |    |                      |               |          |    |                     |               |
|----------|----|-------------------------|----------|----|----------------------|---------------|----------|----|---------------------|---------------|
| NEP      |    |                         |          |    |                      |               |          |    |                     |               |
| A        |    |                         | B        |    |                      | E             |          |    |                     |               |
| --KMPF-- | 23 | 48 B:153 E:136          | --KAMP-- | 29 | 2 A:0 E:5 TOPO_DOM   | 0.85          | --KCCA-- | 35 | 0 A:0 B:1           |               |
| --GSLP-- | 25 | 115 B:114 E:44          | --KAMP-- | 36 | 5 A:0 E:11           |               | --KACC-- | 41 | 3 A:0 B:4           | 0.33 REGION   |
| --PSPD-- | 27 | 27 B:144 E:40           | --KPTC-- | 33 | 27 A:0 E:29 REGION   | 0.22 DISULFID | --KMAH-- | 35 | 2 A:2 B:4           |               |
| --PPTK-- | 33 | 111 B:86 E:44           | --QETC-- | 30 | 4 A:2 E:21 STRAND    | 0.25          | --KMAK-- | 36 | 0 A:1 B:6           |               |
| --VBAH-- | 26 | 53 B:76 E:30            | --QWFF-- | 34 | 7 A:0 E:18           |               | --KMGK-- | 39 | 3 A:0 B:0 DISULFID  | 0.33 DOMAIN   |
| --AKAH-- | 24 | 64 B:160 E:40           | --LQNY-- | 34 | 0 A:0 E:13           |               | --KPCN-- | 38 | 6 A:0 B:2 DISULFID  | 0.33          |
| --SEDP-- | 27 | 89 B:81 E:43            | --WYTY-- | 36 | 4 A:0 E:12 DOMAIN    | 0.90          | --KPCN-- | 45 | 0 A:0 B:7           |               |
| --KSDG-- | 25 | 55 B:85 E:28            | --KQCY-- | 30 | 2 A:1 E:13 TRANSMEM  | 0.48          | --KPTD-- | 37 | 1 A:0 B:2           |               |
| --KSDP-- | 25 | 52 B:57 E:40 PEPTIDE    | --IMQP-- | 36 | 0 A:0 E:10           |               | --KVEP-- | 34 | 0 A:1 B:14          |               |
| --KSDP-- | 25 | 73 B:104 E:41           | --IMHP-- | 32 | 8 A:2 E:24           |               | --LWEN-- | 35 | 3 A:0 B:3 EX_FING   | 0.33          |
| --LSDP-- | 25 | 104 B:109 E:40          | --CITD-- | 30 | 4 A:3 E:20 DOMAIN    | 0.25          | --ATWE-- | 35 | 0 A:2 B:17          |               |
| --AKEP-- | 23 | 68 B:181 E:44           | --QICL-- | 36 | 0 A:1 E:20           |               | --KWCN-- | 34 | 6 A:0 B:12 DISULFID | 0.60          |
| --VARE-- | 24 | 37 B:117 E:34           | --IMHA-- | 30 | 0 A:2 E:4            |               | --KMGK-- | 37 | 2 A:2 B:22          |               |
| --VTEI-- | 24 | 30 B:147 E:26           | --KQWE-- | 35 | 1 A:1 E:11           |               | --KMGK-- | 38 | 12 A:0 B:40 STRAND  | 0.22          |
| --FLRN-- | 23 | 70 B:114 E:40           | --KQCA-- | 30 | 22 A:3 E:17 VAR_SEQ  | 0.23          | --IMQT-- | 33 | 4 A:0 B:16 REGION   | 0.25          |
| --KAMN-- | 25 | 138 B:174 E:39          | --KAPC-- | 40 | 4 A:2 E:17 DOMAIN    | 0.25 REPEAT   | --KMGK-- | 39 | 1 A:0 B:12          |               |
| --KMLV-- | 28 | 22 B:77 E:31            | --KQMG-- | 29 | 2 A:0 E:6 DOMAIN     | 0.90          | --KQFK-- | 38 | 1 A:0 B:5 DOMAIN    | 0.60          |
| --AGAN-- | 24 | 14 B:96 E:34            | --KQFP-- | 29 | 7 A:0 E:21 VAR_SEQ   | 0.29          | --KCEP-- | 33 | 0 A:0 B:1           |               |
| --GMBD-- | 24 | 43 B:96 E:44            | --KQSP-- | 29 | 1 A:1 E:23           |               | --KQEP-- | 34 | 0 A:0 B:0           |               |
| --GANT-- | 22 | 60 B:128 E:44           | --IQGC-- | 29 | 4 A:2 E:19           |               | --KQEK-- | 34 | 6 A:0 B:5 DOMAIN    | 0.33          |
| --GAKK-- | 27 | 124 B:139 E:45          | --VLWG-- | 36 | 7 A:1 E:21 DOMAIN    | 0.43          | --KQCF-- | 38 | 9 A:0 B:4 DOMAIN    | 0.44          |
| --AYEN-- | 22 | 24 B:65 E:43            | --ALWG-- | 37 | 1 A:3 E:4            |               | --KQPK-- | 34 | 0 A:0 B:1           |               |
| --AIFP-- | 22 | 231 B:55 E:27 TRANSMEM  | --LWMD-- | 29 | 3 A:0 E:13 DOMAIN    | 0.33          | --KQAP-- | 33 | 3 A:0 B:12          |               |
| --IIFP-- | 24 | 19 B:57 E:40            | --KLLN-- | 35 | 8 A:2 E:13 DISULFID  | 0.90 TOPO_DOM | --KQAR-- | 35 | 10 A:2 B:22         |               |
| --AKEL-- | 24 | 105 B:121 E:45          | --LWEP-- | 38 | 16 A:0 E:17 TRANSMEM | 0.38          | --KQEP-- | 38 | 9 A:0 B:17          |               |
| --KAPT-- | 24 | 79 B:151 E:42           | --KESK-- | 30 | 11 A:0 E:25 DISULFID | 0.27          | --KQCC-- | 36 | 1 A:0 B:6           |               |
| --AIQV-- | 24 | 110 B:114 E:40          | --KQKL-- | 35 | 16 A:0 E:35          |               | --KQWT-- | 37 | 1 A:1 B:17          |               |
| --AIQV-- | 24 | 89 B:172 E:44           | --KQNK-- | 30 | 2 A:0 E:22           |               | --KQWC-- | 35 | 2 A:0 B:14 DOMAIN   | 0.60          |
| --NEEG-- | 26 | 37 B:106 E:49           | --KQSM-- | 37 | 3 A:1 E:12 REPEAT    | 0.33          | --KQIC-- | 36 | 2 A:0 B:1           |               |
| --NEEG-- | 26 | 37 B:81 E:43            | --KQMP-- | 31 | 8 A:2 E:16           |               | --KQML-- | 33 | 1 A:0 B:3           |               |
| --KQSD-- | 22 | 24 B:89 E:46            | --KQTC-- | 33 | 4 A:0 E:17           |               | --KQCL-- | 33 | 1 A:0 B:3           |               |
| --KQSD-- | 22 | 85 B:104 E:40 TOPO_DOM  | --KQLM-- | 29 | 1 A:2 E:11           | 0.26 TOPO_DOM | --KQCL-- | 34 | 1 A:0 B:6           |               |
| --KQSD-- | 22 | 70 B:126 E:41           | --KQMT-- | 36 | 14 A:2 E:19 DOMAIN   | 0.36          | --KQDM-- | 39 | 1 A:0 B:6           |               |
| --KQSD-- | 22 | 85 B:92 E:41            | --KQER-- | 40 | 7 A:2 E:31           |               | --KQFE-- | 36 | 0 A:0 B:3           |               |
| --KQSD-- | 22 | 78 B:64 E:42            | --KQWR-- | 30 | 4 A:0 E:7 DOMAIN     | 0.25 TRANSMEM | --KQFE-- | 38 | 5 A:2 B:15          | 0.60          |
| --KQSD-- | 22 | 65 B:80 E:45            | --KQEL-- | 29 | 23 A:1 E:29 TOPO_DOM | 0.26          | --KQFE-- | 38 | 2 A:0 B:2           |               |
| --KQSD-- | 22 | 19 B:48 E:27 TRANSMEM   | --KQER-- | 32 | 13 A:1 E:26          |               | --KQFE-- | 35 | 4 A:1 B:16 DOMAIN   | 0.25          |
| --KQSD-- | 22 | 49 B:87 E:40            | --KQCK-- | 31 | 0 A:0 E:6            |               | --KQFE-- | 40 | 1 A:1 B:22          |               |
| --KQSD-- | 22 | 54 B:115 E:41           | --KQVF-- | 38 | 5 A:1 E:21           |               | --KQFE-- | 36 | 0 A:0 B:1           |               |
| --KQSD-- | 22 | 84 B:148 E:44           | --KQVQ-- | 30 | 3 A:0 E:20           |               | --KQFE-- | 40 | 0 A:0 B:3           |               |
| --KQSD-- | 22 | 49 B:122 E:43           | --KQNY-- | 39 | 1 A:1 E:22           |               | --KQFE-- | 33 | 3 A:1 B:2           |               |
| --KQSD-- | 22 | 65 B:157 E:43           | --KQCY-- | 29 | 15 A:1 E:19 TRANSMEM | 0.38          | --KQFE-- | 40 | 2 A:0 B:2           |               |
| --KQSD-- | 22 | 39 B:107 E:43           | --KQVF-- | 33 | 12 A:1 E:23 DISULFID | 0.47 DOMAIN   | --KQFE-- | 37 | 1 A:1 B:15          |               |
| --KQSD-- | 22 | 47 B:59 E:41            | --KQFM-- | 35 | 6 A:3 E:18           |               | --KQFE-- | 35 | 1 A:0 B:16          |               |
| --KQSD-- | 22 | 58 B:94 E:41            | --KQFP-- | 35 | 14 A:2 E:33 REPEAT   | 0.29          | --KQFE-- | 35 | 14 A:0 B:18         |               |
| --KQSD-- | 22 | 12 B:42 E:21            | --KQFP-- | 35 | 3 A:1 E:11 COMPRAS   | 0.33          | --KQFE-- | 35 | 6 A:0 B:19          |               |
| --KQSD-- | 22 | 35 B:40 E:38            | --KQEK-- | 31 | 20 A:0 E:28 DISULFID | 0.30          | --KQFE-- | 35 | 2 A:1 B:24 PROPEP   | 0.60          |
| --KQSD-- | 22 | 62 B:89 E:46            | --KQEL-- | 33 | 13 A:0 E:24          |               | --KQFE-- | 38 | 2 A:0 B:29 TRANSMEM | 0.60          |
| --KQSD-- | 22 | 106 B:93 E:40 TRANSMEM  | --KQCY-- | 29 | 2 A:1 E:19           | 0.31 DISULFID | --KQFE-- | 34 | 9 A:2 B:52 TRANSMEM | 0.22          |
| --KQSD-- | 22 | 67 B:153 E:47           | --KQFP-- | 48 | 1 A:0 E:15 TOPO_DOM  | 0.90          | --KQFE-- | 48 | 0 A:1 B:13          |               |
| --KQSD-- | 22 | 142 B:144 E:44          | --KQFP-- | 47 | 1 A:0 E:17           |               | --KQFE-- | 48 | 3 A:0 B:11 STRAND   | 0.33          |
| --KQSD-- | 22 | 95 B:92 E:48            | --KQFP-- | 31 | 10 A:0 E:26          |               | --KQFE-- | 39 | 1 A:1 B:29          |               |
| --KQSD-- | 22 | 126 B:49 E:40           | --KQFP-- | 35 | 9 A:1 E:25 TOPO_DOM  | 0.33 REPEAT   | --KQFE-- | 45 | 1 A:0 B:1           |               |
| --KQSD-- | 22 | 42 B:89 E:46            | --KQFE-- | 24 | 10 A:1 E:25          |               | --KQFE-- | 34 | 0 A:0 B:4           |               |
| --KQSD-- | 22 | 46 B:106 E:47           | --KQFE-- | 30 | 4 A:1 E:24 VAR_SEQ   | 0.25          | --KQFE-- | 34 | 4 A:1 B:15 TRANSMEM | 0.60          |
| --KQSD-- | 22 | 50 B:70 E:33            | --KQFE-- | 30 | 3 A:1 E:9            |               | --KQFE-- | 37 | 15 A:0 B:2 REGION   | 0.47          |
| --KQSD-- | 22 | 31 B:91 E:45            | --KQFE-- | 39 | 0 A:1 E:15           |               | --KQFE-- | 34 | 0 A:0 B:2           |               |
| --KQSD-- | 22 | 29 B:87 E:41            | --KQFE-- | 30 | 3 A:0 E:14           |               | --KQFE-- | 37 | 2 A:0 B:11          |               |
| --KQSD-- | 22 | 65 B:133 E:46           | --KQFE-- | 33 | 5 A:0 E:13           | 0.36          | --KQFE-- | 38 | 4 A:2 B:18 DOMAIN   | 0.25 TOPO_DOM |
| --KQSD-- | 22 | 46 B:90 E:42            | --KQFE-- | 31 | 20 A:0 E:22          |               | --KQFE-- | 47 | 1 A:0 B:18          |               |
| --KQSD-- | 22 | 113 B:107 E:36 TRANSMEM | --KQFE-- | 35 | 5 A:2 E:26 REGION    | 0.40 EX_FING  | --KQFE-- | 38 | 23 A:0 B:7          |               |
| --KQSD-- | 22 | 33 B:83 E:31            | --KQFE-- | 33 | 4 A:1 E:27 EX_FING   | 0.25 VAR_SEQ  | --KQFE-- | 39 | 0 A:0 B:12          |               |
| --KQSD-- | 22 | 34 B:86 E:42            | --KQFE-- | 42 | 37 A:0 E:27          | 0.46          | --KQFE-- | 34 | 17 A:0 B:4 DOMAIN   | 0.24          |
| --KQSD-- | 22 | 60 B:135 E:40           | --KQFE-- | 35 | 15 A:0 E:28          |               | --KQFE-- | 34 | 2 A:0 B:7           |               |
| --KQSD-- | 22 | 41 B:86 E:41            | --KQFE-- | 31 | 0 A:1 E:7            |               | --KQFE-- | 39 | 6 A:2 B:18          |               |
| --KQSD-- | 22 | 20 B:76 E:32            | --KQFE-- | 33 | 6 A:0 E:19           |               | --KQFE-- | 36 | 3 A:0 B:45          |               |
| --KQSD-- | 22 | 64 B:131 E:39           | --KQFE-- | 31 | 6 A:1 E:21 COMPRAS   | 0.33          | --KQFE-- | 33 | 1 A:0 B:11          |               |
| --KQSD-- | 22 | 80 B:136 E:43 DOMAIN    | --KQFE-- | 30 | 15 A:0 E:27          |               | --KQFE-- | 37 | 3 A:0 B:11          |               |
| --KQSD-- | 22 | 53 B:112 E:31           | --KQFE-- | 35 | 18 A:4 E:30 DISULFID | 0.22          | --KQFE-- | 36 | 1 A:0 B:7           |               |
| --KQSD-- | 22 | 15 B:51 E:39            | --KQFE-- | 30 | 5 A:1 E:27 VAR_SEQ   | 0.90 DOMAIN   | --KQFE-- | 41 | 1 A:0 B:13          |               |
| --KQSD-- | 22 | 64 B:83 E:47            | --KQFE-- | 32 | 16 A:0 E:24          |               | --KQFE-- | 39 | 4 A:0 B:13 DISULFID | 0.25 DOMAIN   |
| --KQSD-- | 22 | 73 B:141 E:39           | --KQFE-- | 30 | 14 A:5 E:19 TOPO_DOM | 0.29          | --KQFE-- | 33 | 8 A:1 B:20          |               |
| --KQSD-- | 22 | 131 B:96 E:47           | --KQFE-- | 32 | 9 A:2 E:21           |               | --KQFE-- | 36 | 1 A:1 B:23          |               |
| --KQSD-- | 22 | 27 B:67 E:33            | --KQFE-- | 37 | 9 A:1 E:21           |               | --KQFE-- | 34 | 1 A:0 B:0 TOPO_DOM  | 0.60          |
| --KQSD-- | 22 | 74 B:131 E:45           | --KQFE-- | 39 | 6 A:0 E:21 COMPRAS   | 0.33          | --KQFE-- | 34 | 2 A:3 B:14          |               |
| --KQSD-- | 22 | 37 B:56 E:35 REGION     | --KQFE-- | 30 | 2 A:1 E:8            |               | --KQFE-- | 33 | 1 A:0 B:6           |               |
| --KQSD-- | 22 | 210 B:80 E:48           | --KQFE-- | 33 | 7 A:2 E:11 TRANSMEM  | 0.43          | --KQFE-- | 48 | 1 A:0 B:11          |               |
| --KQSD-- | 22 | 76 B:66 E:44            | --KQFE-- | 30 | 3 A:2 E:17 TRANSMEM  | 0.33          | --KQFE-- | 33 | 0 A:0 B:5           |               |
| --KQSD-- | 22 | 54 B:119 E:32           | --KQFE-- | 29 | 3 A:2 E:16 DOMAIN    | 0.33 VARIANT  | --KQFE-- | 44 | 0 A:0 B:2           |               |
| --KQSD-- | 22 | 52 B:53 E:43            | --KQFE-- | 30 | 3 A:2 E:17 TOPO_DOM  | 0.33          | --KQFE-- | 36 | 0 A:0 B:5           |               |
| --KQSD-- | 22 | 63 B:42 E:43            | --KQFE-- | 29 | 0 A:1 E:10           |               | --KQFE-- | 37 | 4 A:0 B:19          |               |
| --KQSD-- | 22 | 77 B:121 E:49           | --KQFE-- | 30 | 0 A:0 E:8            |               | --KQFE-- | 33 | 3 A:0 B:14 DOMAIN   | 0.33          |
| --KQSD-- | 22 | 16 B:48 E:24            | --KQFE-- | 31 | 0 A:0 E:5            |               | --KQFE-- | 36 | 2 A:2 B:18          |               |
| --KQSD-- | 22 | 35 B:69 E:40            | --KQFE-- | 30 | 20 A:0 E:26 DISULFID | 0.45 TOPO_DOM | --KQFE-- | 33 | 0 A:0 B:8           |               |
| --KQSD-- | 22 | 53 B:73 E:43 DOMAIN     | --KQFE-- | 32 | 1 A:0 E:10 HoFeature | 0.90          | --KQFE-- | 38 | 6 A:3 B:23          |               |
| --KQSD-- | 22 | 22 B:33 E:38 DOMAIN     | --KQFE-- | 29 | 3 A:0 E:15 DOMAIN    | 0.33 DISULFID | --KQFE-- | 34 | 1 A:1 B:4           |               |
| --KQSD-- | 22 | 21 B:87 E:36 TOPO_DOM   | --KQFE-- | 29 | 0 A:1 E:6            |               | --KQFE-- | 35 | 7 A:0 B:16          |               |
| --KQSD-- | 22 | 40 B:145 E:45           | --KQFE-- | 31 | 2 A:0 E:19           |               | --KQFE-- | 33 | 0 A:0 B:9           |               |
| --KQSD-- | 22 | 70 B:78 E:39 DOMAIN     | --KQFE-- | 30 | 0 A:0 E:6            |               | --KQFE-- | 35 | 2 A:0 B:10 TRANSMEM | 0.60          |
| --KQSD-- | 22 | 36 B:128 E:41           | --KQFE-- | 29 | 10 A:1 E:21 METAL    | 0.30          | --KQFE-- | 34 | 2 A:2 B:7           |               |
| --KQSD-- | 22 | 14 B:38 E:36 TOPO_DOM   | --KQFE-- | 30 | 14 A:0 E:29 VAR_SEQ  | 0.29 TOPO_DOM | --KQFE-- | 49 | 5 A:0 B:8 TOPO_DOM  | 0.40          |
| --KQSD-- | 22 | 89 B:130 E:43           | --KQFE-- | 33 | 7 A:1 E:17 REPEAT    | 0.29 TOPO_DOM | --KQFE-- | 34 | 0 A:0 B:5           |               |
| --KQSD-- | 22 | 65 B:122 E:42           | --KQFE-- | 30 | 16 A:1 E:23          |               | --KQFE-- | 37 | 1 A:0 B:4 TOPO_DOM  | 0.60          |
| --KQSD-- | 22 | 48 B:128 E:40           | --KQFE-- | 30 | 15 A:1 E:25 DOMAIN   | 0.27          | --KQFE-- | 40 | 1 A:1 B:9 REGION    | 0.60          |
| --KQSD-- | 22 | 27 B:97 E:34            | --KQFE-- | 31 | 4 A:0 E:24 DOMAIN    | 0.25 DISULFID | --KQFE-- | 41 | 3 A:1 B:30          |               |
| --KQSD-- | 22 | 33 B:111 E:39           | --KQFE-- | 30 | 3 A:1 E:8 DOMAIN     | 0.33          | --KQFE-- | 49 | 6 A:5 B:16 STRAND   | 0.33          |
| --KQSD-- | 22 | 75 B:76 E:49            | --KQFE-- | 36 | 7 A:1 E:21 REPEAT    | 0.29          | --KQFE-- | 35 | 0 A:0 B:29          |               |
| --KQSD-- | 22 | 80 B:40 E:47            | --KQFE-- | 33 | 3 A:2 E:8            |               | --KQFE-- | 35 | 2 A:0 B:3           |               |
| --KQSD-- | 22 | 39 B:60 E:36            | --KQFE-- | 30 | 19 A:0 E:12 METAL    | 0.49          | --KQFE-- | 37 | 9 A:2 B:16          |               |
| --KQSD-- | 22 | 34 B:102 E:36           | --KQFE-- | 28 | 2 A:0 E:18 TOPO_DOM  | 0.70          | --KQFE-- | 34 | 0 A:0 B:6           |               |

| Genome |    |     |           |  |  |       |     |          |                              |
|--------|----|-----|-----------|--|--|-------|-----|----------|------------------------------|
| ORF    |    |     |           |  |  |       |     |          |                              |
| A      |    | B   |           |  |  | E     |     |          |                              |
| HCCHY  | 18 | 46  | 3 B:35    |  |  | CFREY | 130 | 0 B:6    |                              |
| HCCCH  | 18 | 75  | 0 B:52    |  |  | CFYFA | 366 | 10 B:14  | IM_FING: 0.38                |
| CCCHY  | 18 | 46  | 0 B:34    |  |  | HKESC | 371 | 0 B:5    |                              |
| HKREN  | 10 | 55  | 12 B:47   |  |  | HNFYF | 898 | 3 B:4    | HELIX: 0.33                  |
| HCPHA  | 18 | 114 | 114 B:138 |  |  | CCNPF | 470 | 6 B:15   | TRANSEM: 0.35                |
| CCYCY  | 11 | 57  | 34 B:57   |  |  | HDOCK | 465 | 0 B:8    |                              |
|        |    |     |           |  |  | EMFBC | 394 | 1 B:11   |                              |
|        |    |     |           |  |  | HKQCP | 558 | 4 B:9    | DOMAIN: 0.25 COMBES: 0.25    |
|        |    |     |           |  |  | HKQCC | 570 | 176 B:34 | IM_FING: 0.31                |
|        |    |     |           |  |  | HFKCO | 796 | 12 B:28  | IM_FING: 0.33                |
|        |    |     |           |  |  | HFKCE | 527 | 14 B:20  | IM_FING: 0.35                |
|        |    |     |           |  |  | HQMDQ | 457 | 2 B:10   |                              |
|        |    |     |           |  |  | HMCCT | 467 | 6 B:8    | PROPEP: 0.67                 |
|        |    |     |           |  |  | HQDQC | 445 | 1 B:5    |                              |
|        |    |     |           |  |  | HCCDN | 379 | 2 B:7    | TOPO_DOM: 0.35               |
|        |    |     |           |  |  | HCPNK | 405 | 39 B:22  | LIPID: 0.36 COMBES: 0.26     |
|        |    |     |           |  |  | HCCNY | 470 | 9 B:20   | TOPO_DOM: 0.44               |
|        |    |     |           |  |  | HKQCK | 952 | 0 B:9    |                              |
|        |    |     |           |  |  | HKQCK | 695 | 23 B:24  | IM_FING: 0.33                |
|        |    |     |           |  |  | HKQCK | 468 | 72 B:32  | IM_FING: 0.31                |
|        |    |     |           |  |  | HKQCK | 461 | 209 B:30 | IM_FING: 0.32                |
|        |    |     |           |  |  | HKQCK | 461 | 218 B:36 | IM_FING: 0.48                |
|        |    |     |           |  |  | HKQCK | 931 | 0 B:4    |                              |
|        |    |     |           |  |  | HKQCK | 388 | 1 B:7    |                              |
|        |    |     |           |  |  | HKQCK | 695 | 3 B:8    | TOPO_DOM: 0.33               |
|        |    |     |           |  |  | HKQCK | 839 | 3 B:23   |                              |
|        |    |     |           |  |  | HKQCK | 554 | 2 B:29   |                              |
|        |    |     |           |  |  | HKQCK | 430 | 3 B:10   | DIULFID: 0.33 DOMAIN: 0.33   |
|        |    |     |           |  |  | HKQCK | 461 | 8 B:18   | IM_FING: 0.35                |
|        |    |     |           |  |  | HKQCK | 430 | 43 B:18  | IM_FING: 0.35                |
|        |    |     |           |  |  | HKQCK | 381 | 9 B:13   | IM_FING: 0.44                |
|        |    |     |           |  |  | HKQCK | 844 | 57 B:26  | IM_FING: 0.31                |
|        |    |     |           |  |  | HKQCK | 643 | 10 B:20  |                              |
|        |    |     |           |  |  | HKQCK | 384 | 121 B:30 | DOMAIN: 0.36 TOPO_DOM: 0.21  |
|        |    |     |           |  |  | HKQCK | 387 | 107 B:28 | REPEAT: 0.32 REGION: 0.24    |
|        |    |     |           |  |  | HKQCK | 379 | 2 B:23   | DOMAIN: 0.38                 |
|        |    |     |           |  |  | HKQCK | 423 | 7 B:19   |                              |
|        |    |     |           |  |  | HKQCK | 378 | 0 B:9    |                              |
|        |    |     |           |  |  | HKQCK | 460 | 8 B:12   | IM_FING: 0.25                |
|        |    |     |           |  |  | HKQCK | 451 | 60 B:31  | IM_FING: 0.35                |
|        |    |     |           |  |  | HKQCK | 524 | 124 B:32 | IM_FING: 0.47                |
|        |    |     |           |  |  | HKQCK | 524 | 0 B:3    |                              |
|        |    |     |           |  |  | HKQCK | 788 | 1 B:8    |                              |
|        |    |     |           |  |  | HKQCK | 796 | 1 B:4    |                              |
|        |    |     |           |  |  | HKQCK | 427 | 3 B:4    |                              |
|        |    |     |           |  |  | HKQCK | 433 | 4 B:12   | REPEAT: 0.35                 |
|        |    |     |           |  |  | HKQCK | 520 | 15 B:24  |                              |
|        |    |     |           |  |  | HKQCK | 430 | 0 B:8    |                              |
|        |    |     |           |  |  | HKQCK | 470 | 1 B:14   | TOPO_DOM: 0.35               |
|        |    |     |           |  |  | HKQCK | 464 | 1 B:8    |                              |
|        |    |     |           |  |  | HKQCK | 933 | 133 B:29 | IM_FING: 0.35                |
|        |    |     |           |  |  | HKQCK | 721 | 122 B:31 | IM_FING: 0.27                |
|        |    |     |           |  |  | HKQCK | 399 | 0 B:3    |                              |
|        |    |     |           |  |  | HKQCK | 391 | 0 B:3    |                              |
|        |    |     |           |  |  | HKQCK | 435 | 6 B:15   | DOMAIN: 0.35                 |
|        |    |     |           |  |  | HKQCK | 411 | 2 B:4    | REGION: 0.55                 |
|        |    |     |           |  |  | HKQCK | 400 | 0 B:11   |                              |
|        |    |     |           |  |  | HKQCK | 438 | 3 B:3    | REGION: 0.33 CARBOHYD: 0.33  |
|        |    |     |           |  |  | HKQCK | 585 | 10 B:23  | DOMAIN: 0.30 TOPO_DOM: 0.30  |
|        |    |     |           |  |  | HKQCK | 396 | 0 B:9    |                              |
|        |    |     |           |  |  | HKQCK | 500 | 0 B:12   |                              |
|        |    |     |           |  |  | HKQCK | 788 | 2 B:3    | REGION: 0.35                 |
|        |    |     |           |  |  | HKQCK | 710 | 0 B:5    |                              |
|        |    |     |           |  |  | HKQCK | 414 | 21 B:23  |                              |
|        |    |     |           |  |  | HKQCK | 545 | 1 B:10   |                              |
|        |    |     |           |  |  | HKQCK | 370 | 92 B:33  | DOMAIN: 0.37                 |
|        |    |     |           |  |  | HKQCK | 766 | 0 B:5    |                              |
|        |    |     |           |  |  | HKQCK | 569 | 0 B:3    |                              |
|        |    |     |           |  |  | HKQCK | 598 | 0 B:10   |                              |
|        |    |     |           |  |  | HKQCK | 370 | 7 B:24   | IM_FING: 0.29                |
|        |    |     |           |  |  | HKQCK | 444 | 22 B:17  | CARBOHYD: 0.32               |
|        |    |     |           |  |  | HKQCK | 379 | 8 B:10   | IM_FING: 0.38                |
|        |    |     |           |  |  | HKQCK | 500 | 2 B:5    |                              |
|        |    |     |           |  |  | HKQCK | 441 | 0 B:8    |                              |
|        |    |     |           |  |  | HKQCK | 439 | 0 B:2    |                              |
|        |    |     |           |  |  | HKQCK | 535 | 222 B:48 | IM_FING: 0.37                |
|        |    |     |           |  |  | HKQCK | 571 | 2 B:12   | IM_FING: 0.35                |
|        |    |     |           |  |  | HKQCK | 428 | 2 B:5    | DOMAIN: 0.35                 |
|        |    |     |           |  |  | HKQCK | 462 | 70 B:32  | DIULFID: 0.44                |
|        |    |     |           |  |  | HKQCK | 537 | 0 B:1    |                              |
|        |    |     |           |  |  | HKQCK | 377 | 10 B:18  |                              |
|        |    |     |           |  |  | HKQCK | 382 | 111 B:27 | DIULFID: 0.32                |
|        |    |     |           |  |  | HKQCK | 798 | 2 B:6    |                              |
|        |    |     |           |  |  | HKQCK | 802 | 2 B:5    | DOMAIN: 0.35                 |
|        |    |     |           |  |  | HKQCK | 561 | 0 B:6    |                              |
|        |    |     |           |  |  | HKQCK | 814 | 87 B:33  | DIULFID: 0.46                |
|        |    |     |           |  |  | HKQCK | 373 | 11 B:28  | IM_FING: 0.45                |
|        |    |     |           |  |  | HKQCK | 445 | 6 B:16   |                              |
|        |    |     |           |  |  | HKQCK | 381 | 13 B:12  |                              |
|        |    |     |           |  |  | HKQCK | 633 | 15 B:23  | COLLED: 0.27                 |
|        |    |     |           |  |  | HKQCK | 390 | 34 B:44  |                              |
|        |    |     |           |  |  | HKQCK | 414 | 8 B:12   | TOPO_DOM: 0.38 DIULFID: 0.25 |
|        |    |     |           |  |  | HKQCK | 468 | 2 B:18   | DOMAIN: 0.38 TOPO_DOM: 0.38  |
|        |    |     |           |  |  | HKQCK | 763 | 1 B:4    |                              |
|        |    |     |           |  |  | HKQCK | 428 | 1 B:2    |                              |
|        |    |     |           |  |  | HKQCK | 449 | 0 B:10   |                              |
|        |    |     |           |  |  | HKQCK | 379 | 50 B:41  | REGION: 0.48                 |
|        |    |     |           |  |  | HKQCK | 519 | 49 B:10  |                              |
|        |    |     |           |  |  | HKQCK | 445 | 9 B:13   | TRANSEM: 0.44                |
|        |    |     |           |  |  | HKQCK | 451 | 15 B:32  | IM_FING: 0.47                |

| Genome   |      |      |                          |      |          |      |          |      |      |                  |      |          |      |          |                      |      |                          |      |          |      |
|----------|------|------|--------------------------|------|----------|------|----------|------|------|------------------|------|----------|------|----------|----------------------|------|--------------------------|------|----------|------|
| URP      |      |      |                          |      |          |      |          |      |      |                  |      |          |      |          |                      |      |                          |      |          |      |
| A        |      |      | B                        |      |          | E    |          |      |      |                  |      |          |      |          |                      |      |                          |      |          |      |
| --NRBP-- | 3470 | 0.18 | 720 R:72 E:40 DOMAIN     | 0.44 | TOPO_DOM | 0.44 | --CFAN-- | 1230 | 0.09 | 9 E:13 TRANSMEM  | 0.44 | --PRYM-- | 47   | 0        | 4 A:0 B:9 E:0 REGION | 0.25 | TRANSMEM                 | 0.25 |          |      |
| --NRBP-- | 3481 | 0.48 | 491 R:43 E:14 DOMAIN     | 0.44 | TOPO_DOM | 0.44 | --CFAN-- | 1231 | 0.09 | 1 E:7            | 0.44 | --PRYM-- | 48   | 0.01     | 10 A:0 B:9 E:1       | 0.25 | TRANSMEM                 | 0.25 |          |      |
| --NRBP-- | 5241 | 0.77 | 529 R:34 E:10 EM_FING    | 0.42 |          |      | --NRBP-- | 1232 | 0.24 | 5 E:12 EM_FING   | 0.25 | --NRBP-- | 49   | 0.01     | 6 A:1 B:40 E:1       | 0.25 | TRANSMEM                 | 0.25 |          |      |
| --NRBP-- | 5242 | 0.97 | 1142 R:18 E:10 EM_FING   | 0.72 |          |      | --NRBP-- | 1233 | 0.09 | 0 E:8            | 0.25 | --NRBP-- | 50   | 0.17     | 9 A:0 B:43 E:0 HELIX | 0.22 | TRANSMEM                 | 0.22 |          |      |
| --NRBP-- | 7400 | 0.98 | 717 R:13 E:13 EM_FING    | 0.49 |          |      | --NRBP-- | 1234 | 0.02 | 4 E:9 COMPRIAS   | 0.25 | DOMAIN   | 0.25 | --NRBP-- | 51                   | 0    | 1 A:1 B:12 E:2           | 0.25 | TRANSMEM | 0.25 |
| --NRBP-- | 4777 | 0.91 | 295 R:33 E:13 EM_FING    | 0.63 |          |      | --NRBP-- | 1235 | 0.02 | 10 E:22          | 0.25 | DOMAIN   | 0.25 | --NRBP-- | 52                   | 0.12 | 18 A:0 B:9 E:0 DOMAIN    | 0.44 | TRANSMEM | 0.44 |
| --NRBP-- | 5887 | 0.43 | 206 R:40 E:12 EM_FING    | 0.39 |          |      | --NRBP-- | 1236 | 0.02 | 15 E:27 DOMAIN   | 0.33 | TRANSMEM | 0.33 | --NRBP-- | 53                   | 0.14 | 8 A:0 B:84 E:1           | 0.25 | TRANSMEM | 0.25 |
| --NRBP-- | 3379 | 0.44 | 244 R:57 E:16 EM_FING    | 0.54 |          |      | --NRBP-- | 1237 | 0.02 | 23 E:24 EM_FING  | 0.41 | TRANSMEM | 0.41 | --NRBP-- | 54                   | 0.02 | 12 A:0 B:100 E:2         | 0.25 | TRANSMEM | 0.25 |
| --NRBP-- | 3058 | 0.50 | 187 R:22 E:13 EM_FING    | 0.47 |          |      | --NRBP-- | 1238 | 0.04 | 60 E:11 EM_FING  | 0.42 | TRANSMEM | 0.42 | --NRBP-- | 55                   | 0.18 | 2 A:0 B:5 E:1            | 0.25 | TRANSMEM | 0.25 |
| --NRBP-- | 2262 | 0.50 | 244 R:27 E:41 EM_FING    | 0.59 |          |      | --NRBP-- | 1239 | 0.01 | 124 E:12 EM_FING | 0.47 | TRANSMEM | 0.47 | --NRBP-- | 56                   | 0    | 7 A:0 B:43 E:2 REGION    | 0.29 | TRANSMEM | 0.29 |
| --NRBP-- | 3113 | 0.58 | 326 R:15 E:40 EM_FING    | 0.67 |          |      | --NRBP-- | 1240 | 0.02 | 92 E:18 EM_FING  | 0.37 | TRANSMEM | 0.37 | --NRBP-- | 57                   | 0.01 | 36 A:0 B:52 E:1          | 0.25 | TRANSMEM | 0.25 |
| --NRBP-- | 2316 | 0.39 | 211 R:41 E:19 EM_FING    | 0.51 |          |      | --NRBP-- | 1241 | 0.04 | 218 E:16 EM_FING | 0.49 | TRANSMEM | 0.49 | --NRBP-- | 58                   | 0    | 4 A:3 B:16 E:2           | 0.25 | TRANSMEM | 0.25 |
| --NRBP-- | 2953 | 0.83 | 16 E:59 E:41 TOPO_DOM    | 0.22 |          |      | --NRBP-- | 1242 | 0.04 | 113 E:29 EM_FING | 0.56 | TRANSMEM | 0.56 | --NRBP-- | 59                   | 0    | 1 A:0 B:19 E:1 REGION    | 0.33 | TRANSMEM | 0.33 |
| --NRBP-- | 3225 | 0.61 | 60 R:48 E:42 HELIX       | 0.23 |          |      | --NRBP-- | 1243 | 0.02 | 122 E:11 EM_FING | 0.57 | TRANSMEM | 0.57 | --NRBP-- | 60                   | 0    | 6 A:0 B:47 E:2           | 0.25 | TRANSMEM | 0.25 |
| --NRBP-- | 3226 | 0.78 | 1644 R:63 E:44 EM_FING   | 0.62 |          |      | --NRBP-- | 1244 | 0.06 | 57 E:26 EM_FING  | 0.52 | TRANSMEM | 0.52 | --NRBP-- | 61                   | 0    | 3 A:1 B:41 E:2 HELIX     | 0.33 | TRANSMEM | 0.33 |
| --NRBP-- | 9181 | 0.80 | 335 R:14 E:11 EM_FING    | 0.43 |          |      | --NRBP-- | 1245 | 0.02 | 76 E:25 EM_FING  | 0.49 | TRANSMEM | 0.49 | --NRBP-- | 62                   | 0    | 10 A:0 B:85 E:2          | 0.25 | TRANSMEM | 0.25 |
| --NRBP-- | 1246 | 0.73 | 230 R:18 E:12 EM_FING    | 0.48 |          |      | --NRBP-- | 1246 | 0.03 | 72 E:12 EM_FING  | 0.51 | TRANSMEM | 0.51 | --NRBP-- | 63                   | 0    | 14 A:1 B:32 E:2          | 0.25 | TRANSMEM | 0.25 |
| --NRBP-- | 4460 | 0.93 | 199 R:18 E:12 EM_FING    | 0.59 |          |      | --NRBP-- | 1247 | 0.01 | 209 E:10 EM_FING | 0.47 | TRANSMEM | 0.47 | --NRBP-- | 64                   | 0.01 | 0 A:0 B:28 E:0           | 0.25 | TRANSMEM | 0.25 |
| --NRBP-- | 2311 | 1.00 | 186 R:8 E:16 EM_FING     | 0.25 |          |      | --NRBP-- | 1248 | 0.24 | 5 E:11 HELIX     | 0.46 | TRANSMEM | 0.46 | --NRBP-- | 65                   | 0    | 7 A:1 B:46 E:2           | 0.25 | TRANSMEM | 0.25 |
| --NRBP-- | 3534 | 1.00 | 84 R:5 E:26 EM_FING      | 0.74 |          |      | --NRBP-- | 1249 | 0.11 | 25 E:23          | 0.46 | TRANSMEM | 0.46 | --NRBP-- | 66                   | 0    | 13 A:0 B:19 E:2 DOMAIN   | 0.31 | TRANSMEM | 0.31 |
| --NRBP-- | 3071 | 1.00 | 176 R:2 E:134 EM_FING    | 0.71 |          |      | --NRBP-- | 1250 | 0.02 | 10 E:14 DISULFID | 0.30 | DOMAIN   | 0.30 | --NRBP-- | 67                   | 0    | 13 A:1 B:64 E:2 TOPO_DOM | 0.31 | TRANSMEM | 0.31 |
| --NRBP-- | 4240 | 1.00 | 249 R:24 E:18 EM_FING    | 0.64 |          |      | --NRBP-- | 1251 | 0.02 | 8 E:14 HELIX     | 0.33 | TRANSMEM | 0.33 | --NRBP-- | 68                   | 0.01 | 14 A:0 B:47 E:1 TRANSMEM | 0.29 | TRANSMEM | 0.29 |
| --NRBP-- | 2244 | 0.06 | 21 R:41 E:25             | 0.23 |          |      | --NRBP-- | 1252 | 0.16 | 2 E:10           | 0.33 | TRANSMEM | 0.33 | --NRBP-- | 69                   | 0    | 7 A:0 B:52 E:2 STRAND    | 0.29 | TRANSMEM | 0.29 |
| --NRBP-- | 2230 | 0.15 | 7 R:31 E:26              | 0.22 |          |      | --NRBP-- | 1253 | 0.35 | 6 E:8 PROPEP     | 0.47 | TRANSMEM | 0.47 | --NRBP-- | 70                   | 0.11 | 0 A:0 B:1 E:1            | 0.25 | TRANSMEM | 0.25 |
| --NRBP-- | 2241 | 0.48 | 98 R:55 E:19             | 0.48 |          |      | --NRBP-- | 1254 | 0.48 | 43 E:18 TOPO_DOM | 0.46 | TRANSMEM | 0.46 | --NRBP-- | 71                   | 0.08 | 15 A:0 B:44 E:2 METAL    | 0.35 | COXII    | 0.35 |
| --NRBP-- | 2472 | 0.98 | 530 R:68 E:47 COMPRIAS   | 0.44 |          |      | --NRBP-- | 1255 | 0.41 | 0 E:6            | 0.48 | TRANSMEM | 0.48 | --NRBP-- | 72                   | 0.24 | 21 A:1 B:90 E:1 TRANSMEM | 0.48 | TRANSMEM | 0.48 |
| --NRBP-- | 2214 | 0.83 | 105 R:116 E:47           | 0.44 |          |      | --NRBP-- | 1256 | 0.06 | 3 E:10 DISULFID  | 0.33 | DOMAIN   | 0.33 | --NRBP-- | 73                   | 0    | 16 A:0 B:76 E:2          | 0.25 | TRANSMEM | 0.25 |
| --NRBP-- | 2505 | 0.87 | 221 R:50 E:16 EM_FING    | 0.54 |          |      | --NRBP-- | 1257 | 0.04 | 6 E:15 TRANSMEM  | 0.33 | TRANSMEM | 0.33 | --NRBP-- | 74                   | 0.10 | 8 A:0 B:60 E:2 TRANSMEM  | 0.33 | TRANSMEM | 0.33 |
| --NRBP-- | 2660 | 0.68 | 272 R:43 E:19 EM_FING    | 0.59 |          |      | --NRBP-- | 1258 | 0.03 | 8 E:9            | 0.33 | TRANSMEM | 0.33 | --NRBP-- | 75                   | 0.01 | 0 A:1 B:9 E:1            | 0.25 | TRANSMEM | 0.25 |
| --NRBP-- | 2837 | 1.00 | 488 R:48 E:47 COMPRIAS   | 0.44 |          |      | --NRBP-- | 1259 | 0.35 | 49 E:10          | 0.33 | TRANSMEM | 0.33 | --NRBP-- | 76                   | 0    | 4 A:0 B:46 E:1           | 0.25 | TRANSMEM | 0.25 |
| --NRBP-- | 2623 | 1.00 | 438 R:55 E:18 COMPRIAS   | 0.44 |          |      | --NRBP-- | 1260 | 0.16 | 6 E:15           | 0.48 | TRANSMEM | 0.48 | --NRBP-- | 77                   | 0    | 10 A:0 B:37 E:2          | 0.25 | TRANSMEM | 0.25 |
| --NRBP-- | 3019 | 1.00 | 451 R:68 E:47 COMPRIAS   | 0.44 |          |      | --NRBP-- | 1261 | 0.31 | 8 E:20 TOPO_DOM  | 0.44 | TRANSMEM | 0.44 | --NRBP-- | 78                   | 0.09 | 6 A:0 B:88 E:2           | 0.25 | TRANSMEM | 0.25 |
| --NRBP-- | 3128 | 1.00 | 383 R:9 E:10 EM_FING     | 0.63 |          |      | --NRBP-- | 1262 | 0.93 | 1 E:8            | 0.44 | TRANSMEM | 0.44 | --NRBP-- | 79                   | 0.02 | 5 A:0 B:46 E:1           | 0.25 | TRANSMEM | 0.25 |
| --NRBP-- | 2264 | 0.73 | 337 R:11 E:17 EM_FING    | 0.59 |          |      | --NRBP-- | 1263 | 0.20 | 39 E:22 LIPID    | 0.36 | COMPRIAS | 0.36 | --NRBP-- | 80                   | 0.15 | 8 A:0 B:61 E:1 TRANSMEM  | 0.33 | TRANSMEM | 0.33 |
| --NRBP-- | 3551 | 0.55 | 3341 R:9 E:41 EM_FING    | 0.72 |          |      | --NRBP-- | 1264 | 0.11 | 8 E:18 EM_FING   | 0.59 | TRANSMEM | 0.59 | --NRBP-- | 81                   | 0.02 | 11 A:0 B:49 E:2          | 0.25 | TRANSMEM | 0.25 |
| --NRBP-- | 4837 | 0.66 | 329 R:15 E:17 EM_FING    | 0.58 |          |      | --NRBP-- | 1265 | 0.29 | 43 E:18 EM_FING  | 0.56 | TRANSMEM | 0.56 | --NRBP-- | 82                   | 0.04 | 15 A:0 B:49 E:2 TRANSMEM | 0.27 | TOPO_DOM | 0.27 |
| --NRBP-- | 4258 | 0.60 | 471 R:4 E:45 EM_FING     | 0.51 |          |      | --NRBP-- | 1266 | 0.03 | 14 E:10 TOPO_DOM | 0.33 | DISULFID | 0.33 | --NRBP-- | 83                   | 0    | 1 A:0 B:48 E:2           | 0.25 | TRANSMEM | 0.25 |
| --NRBP-- | 2458 | 0.19 | 417 R:51 E:45 REGION     | 0.40 |          |      | --NRBP-- | 1267 | 0.05 | 95 E:25 EM_FING  | 0.51 | TRANSMEM | 0.51 | --NRBP-- | 84                   | 0    | 3 A:0 B:45 E:2           | 0.25 | TRANSMEM | 0.25 |
| --NRBP-- | 3421 | 0.61 | 407 R:138 E:42 REGION    | 0.43 |          |      | --NRBP-- | 1268 | 0.02 | 14 E:20 EM_FING  | 0.50 | TRANSMEM | 0.50 | --NRBP-- | 85                   | 0    | 16 A:0 B:87 E:1 TRANSMEM | 0.27 | TRANSMEM | 0.27 |
| --NRBP-- | 2889 | 0.46 | 351 R:19 E:19 EM_FING    | 0.52 |          |      | --NRBP-- | 1269 | 0.08 | 176 E:14 EM_FING | 0.51 | TRANSMEM | 0.51 | --NRBP-- | 86                   | 0.21 | 9 A:0 B:82 E:2 TOPO_DOM  | 0.44 | TRANSMEM | 0.44 |
| --NRBP-- | 2304 | 0.92 | 271 R:11 E:16 EM_FING    | 0.63 |          |      | --NRBP-- | 1270 | 0.23 | 22 E:10          | 0.41 | TRANSMEM | 0.41 | --NRBP-- | 87                   | 0.02 | 6 A:0 B:42 E:0 STRAND    | 0.33 | TRANSMEM | 0.33 |
| --NRBP-- | 4242 | 0.60 | 654 R:20 E:12 EM_FING    | 0.68 |          |      | --NRBP-- | 1271 | 0.03 | 15 E:24          | 0.33 | TRANSMEM | 0.33 | --NRBP-- | 88                   | 0    | 7 A:0 B:45 E:1 STRAND    | 0.29 | TRANSMEM | 0.29 |
| --NRBP-- | 8630 | 0.80 | 133 R:27 E:13 EM_FING    | 0.32 |          |      | --NRBP-- | 1272 | 0.02 | 3 E:19 METAL     | 0.33 | TRANSMEM | 0.33 | --NRBP-- | 89                   | 0.05 | 8 A:0 B:49 E:1 TRANSMEM  | 0.38 | TRANSMEM | 0.38 |
| --NRBP-- | 5170 | 0.25 | 476 R:23 E:16 EM_FING    | 0.54 |          |      | --NRBP-- | 1273 | 0.01 | 3 E:19           | 0.33 | TRANSMEM | 0.33 | --NRBP-- | 90                   | 0.12 | 4 A:1 B:53 E:1 TRANSMEM  | 0.33 | TRANSMEM | 0.33 |
| --NRBP-- | 3859 | 0.29 | 422 R:13 E:13 EM_FING    | 0.71 |          |      | --NRBP-- | 1274 | 0.26 | 0 E:3            | 0.33 | TRANSMEM | 0.33 | --NRBP-- | 91                   | 0.07 | 8 A:1 B:64 E:1 TRANSMEM  | 0.33 | TRANSMEM | 0.33 |
| --NRBP-- | 3964 | 0.52 | 291 R:7 E:28 EM_FING     | 0.57 |          |      | --NRBP-- | 1275 | 0.77 | 0 E:10           | 0.33 | TRANSMEM | 0.33 | --NRBP-- | 92                   | 0.02 | 114 A:0 B:138 E:2        | 0.25 | TRANSMEM | 0.25 |
| --NRBP-- | 2687 | 0.29 | 400 R:13 E:12 EM_FING    | 0.57 |          |      | --NRBP-- | 1276 | 0.28 | 0 E:9            | 0.33 | TRANSMEM | 0.33 | --NRBP-- | 93                   | 0.08 | 34 A:0 B:57 E:2          | 0.25 | TRANSMEM | 0.25 |
| --NRBP-- | 4651 | 0.09 | 442 R:54 E:18 COMPRIAS   | 0.51 |          |      | --NRBP-- | 1277 | 0.03 | 6 E:15 DOMAIN    | 0.44 | TRANSMEM | 0.44 | --NRBP-- | 94                   | 0.06 | 10 A:0 B:36 E:2          | 0.25 | TRANSMEM | 0.25 |
| --NRBP-- | 3595 | 1.00 | 697 R:69 E:46 COMPRIAS   | 0.52 |          |      | --NRBP-- | 1278 | 0.04 | 2 E:4 REGION     | 0.44 | TRANSMEM | 0.44 | --NRBP-- | 95                   | 0.06 | 11 A:0 B:53 E:1 TOPO_DOM | 0.27 | TRANSMEM | 0.27 |
| --NRBP-- | 2697 | 0    | 459 R:115 E:50 COMPRIAS  | 0.32 |          |      | --NRBP-- | 1279 | 0.04 | 3 E:8            | 0.44 | TRANSMEM | 0.44 | --NRBP-- | 96                   | 0    | 61 A:1 B:47 E:1          | 0.25 | TRANSMEM | 0.25 |
| --NRBP-- | 6485 | 0.35 | 1041 R:132 E:48 COMPRIAS | 0.45 |          |      | --NRBP-- | 1280 | 0.12 | 1 E:4            | 0.44 | TRANSMEM | 0.44 | --NRBP-- | 97                   | 0.24 | 0 A:0 B:65 E:0           | 0.25 | TRANSMEM | 0.25 |
| --NRBP-- | 2322 | 0.66 | 52 R:52 E:44             | 0.45 |          |      | --NRBP-- | 1281 | 0.24 | 3 E:4            | 0.44 | TRANSMEM | 0.44 | --NRBP-- | 98                   | 0.02 | 20 A:0 B:64 E:2          | 0.25 | TRANSMEM | 0.25 |
| --NRBP-- | 2640 | 0.32 | 727 R:16 E:17 DOMAIN     | 0.37 | DISULFID | 0.36 | --NRBP-- | 1282 | 0.43 | 4 E:12 REPEAT    | 0.46 | TRANSMEM | 0.46 | --NRBP-- | 99                   | 0    | 4 A:0 B:41 E:1 DOMAIN    | 0.25 | TRANSMEM | 0.25 |
| --NRBP-- | 2880 | 0.33 | 548 R:18 E:18 COMPRIAS   | 0.36 | DISULFID | 0.36 | --NRBP-- | 1283 | 0.03 | 14 E:20 TOPO_DOM | 0.33 | TRANSMEM | 0.33 | --NRBP-- | 100                  | 0    | 10 A:0 B:40 E:2 STRAND   | 0.29 | TRANSMEM | 0.29 |
| --NRBP-- | 3072 | 0.71 | 308 R:12 E:13 EM_FING    | 0.41 |          |      | --NRBP-- | 1284 | 0.03 | 0 E:8            | 0.33 | TRANSMEM | 0.33 | --NRBP-- | 101                  | 0.02 | 1 A:0 B:12 E:1           | 0.25 | TRANSMEM | 0.25 |
| --NRBP-- | 7922 | 0.91 | 405 R:5 E:10 EM_FING     | 0.60 |          |      | --NRBP-- | 1285 | 0.18 | 3 E:9 TOPO_DOM   | 0.33 | TRANSMEM | 0.33 | --NRBP-- |                      |      |                          |      |          |      |
